1                                   **Multi-Factor Authentication of Potential 5' Splice Sites**  
2                                   **by the *Saccharomyces cerevisiae* U1 snRNP**

3  
4  
5 **AUTHORS:** Sarah R. Hansen<sup>1,2</sup>, Mark Scalf<sup>3</sup>, Ivan R. Corrêa Jr<sup>4</sup>, Lloyd M. Smith<sup>3</sup>, and Aaron A.  
6 Hoskins<sup>1,2,3\*</sup>

7  
8 **CORRESPONDING AUTHOR:**

9 \*Aaron A. Hoskins, [ahoskins@wisc.edu](mailto:ahoskins@wisc.edu)

10 **AFFILIATIONS:**

11 <sup>1</sup> Department of Biochemistry, U. Wisconsin-Madison, Madison, WI 53706

12 <sup>2</sup> Integrated Program in Biochemistry, U. Wisconsin-Madison, Madison, WI 53706

13 <sup>3</sup> Department of Chemistry, U. Wisconsin-Madison, Madison, WI 53706

14 <sup>4</sup> New England Biolabs, Ipswich, MA 01938

15

16 **MAJOR SUBJECT AREAS:** Biochemistry, Biophysics

17

18 **KEYWORDS:** Splicing, Single Molecule Fluorescence, CoSMoS, Spliceosome, snRNP, RNA

19

20 **RESEARCH ORGANISMS:** *S. cerevisiae* (Baker's yeast)

21

22

23 **ABSTRACT**

24 In eukaryotes, splice sites define the introns of pre-mRNAs and must be recognized and  
25 excised with nucleotide precision by the spliceosome to make the correct mRNA product. In one  
26 of the earliest steps of spliceosome assembly, the U1 small nuclear ribonucleoprotein (snRNP)  
27 recognizes the 5' splice site (5' SS) through a combination of base pairing, protein-RNA contacts,  
28 and interactions with other splicing factors. Previous studies investigating the mechanisms of 5'  
29 SS recognition have largely been done *in vivo* or in cellular extracts where the U1/5' SS  
30 interaction is difficult to deconvolute from the effects of *trans*-acting factors or RNA structure. In  
31 this work we used co-localization single-molecule spectroscopy (CoSMoS) to elucidate the  
32 pathway of 5' SS selection by purified yeast U1 snRNP. We determined that U1 reversibly  
33 selects 5' SS in a sequence-dependent, two-step mechanism. A kinetic selection scheme  
34 enforces pairing at particular positions rather than overall duplex stability to achieve long-lived  
35 U1 binding. Our results provide a kinetic basis for how U1 may rapidly surveil nascent transcripts  
36 for 5' SS and preferentially accumulate at these sequences rather than on close cognates.

37

38

39

40 **IMPACT STATEMENT**

41 The yeast U1 snRNP recognizes multiple features of target RNAs to reversibly identify splicing-

42 competent 5' splice sites.

## 43 INTRODUCTION

44 In eukaryotes, the introns of precursor messenger RNA (pre-mRNA) must be identified  
45 and removed with nucleotide precision by the spliceosome to produce mRNA (Wahl et al., 2009).  
46 The junction between an intron and the upstream exon is marked by the 5' splice site (5' SS)  
47 sequence, a motif that is essential for assembly of the spliceosome and both catalytic steps of  
48 splicing. Though the 5' SS is marked by a conserved consensus sequence (5'-GUAUGU in  
49 yeast, 5'-GURAG in humans) only the first two nucleotides are nearly invariant (99% GU, <1%  
50 GC) as they are necessary for catalysis (Fouser and Friesen, 1986; Konarska, 1998; Parker and  
51 Siliciano, 1993; Roca et al., 2013; Vijayraghavan et al., 1989; Wilkinson et al., 2017). The other  
52 positions are degenerate, especially in the human genome where more than 9,000 variants of  
53 the -3 to +6 region of the 5' SS are utilized (Carmel et al., 2004; Roca et al., 2013). Despite this  
54 degeneracy, the precise determination of exon-intron boundaries is essential to healthy cellular  
55 function. An estimated 50% of all disease-related point mutations alter splicing in some way,  
56 with 14% of all disease-related point mutations occurring at splice sites (Soemedi et al., 2017).

57 U1 small nuclear ribonucleoprotein complex (snRNP) is responsible for 5' SS selection  
58 during the earliest steps of spliceosome assembly (Lacadie and Rosbash, 2005; Rosbash and  
59 Séraphin, 1991; Ruby and Abelson, 1988). The 5' SS consensus sequence is complementary  
60 to the 5' end of U1 small nuclear RNA (Lerner et al., 1980). Since the first ten nucleotides of U1  
61 snRNA (splice site recognition sequence, SSRS) are perfectly conserved between yeast and  
62 humans, this implies a conserved mechanism of 5' SS selection determined, in part, by base  
63 pairing (Rosbash and Séraphin, 1991). However, the degeneracy of certain positions within the  
64 5' SS consensus shows that SSRS/5' SS duplexes often form with less than complete  
65 complementarity, and a subset of SSRS/5' SS interactions can even occur with noncanonical  
66 registers (Roca and Krainer, 2009). Additionally, there are many sequences which have a high  
67 degree of complementarity to U1 but are not utilized as splice sites (pseudo 5' SS) or only used

68 when nearby canonical 5' SS are inactivated (cryptic 5' SS) (Roca et al., 2013). Together these  
69 observations show that base pairing strength with the U1 SSRS alone cannot predict 5' SS  
70 usage. Since the 5' SS must be transferred from the U1 to the U6 snRNA for splicing to occur,  
71 spliced mRNA formation is a convolution of multiple 5' SS recognition events (Brow, 2002). As  
72 a result, it is difficult to determine how U1 SSRS/5' SS interactions change between different  
73 sequences based on analysis of mRNAs.

74 Structural biology of both *Saccharomyces cerevisiae* (yeast) and human U1 snRNP has  
75 revealed how snRNP proteins could play key roles in 5' SS recognition in addition to base pairing  
76 with the SSRS. In crystal structures of human U1 snRNP bound to a 5' SS-containing RNA  
77 oligonucleotide (oligo), the conserved U1-C protein (Yhc1 in yeast) contacts the SSRS/5' SS  
78 duplex in the minor groove at the pairing site between the nearly invariant 5' SS G(+1) and U(+2)  
79 nucleotides with the snRNA (Kondo et al., 2015; Krummel et al., 2009). Similarly, in cryo-EM  
80 structures containing yeast U1 snRNP, Yhc1 contacts the SSRS/5' SS duplex, also near G(+1),  
81 while a second yeast splicing factor, Luc7, contacts the snRNA strand opposite (Bai et al., 2018;  
82 Li et al., 2019; Plaschka et al., 2018). The proximity of Yhc1 and Luc7 to the SSRS/5' SS duplex  
83 are also consistent with genetic data supporting roles for these proteins in 5' SS recognition  
84 (Chen et al., 2001; Fortes et al., 1999; Schwer and Shuman, 2015, 2014). Filter-binding  
85 competition assays using a reconstituted human U1 snRNP showed that U1-C contributes to the  
86 affinity and specificity of U1 for 5' SS RNA oligos (Kondo et al., 2015). However, these assays  
87 are difficult to interpret with respect to a mechanism of 5' SS discrimination since it is unclear if  
88 equilibrium was reached during the experiment (Jarmoskaite et al., 2020), the assay was limited  
89 in its ability to directly detect interactions with non-consensus 5' SS, and it provided no  
90 information on how or if the kinetics of U1 interactions differed between different 5' SS RNAs.  
91 Thus, it is unknown if recognition of 5' SS originates from U1's failure to bind mismatched RNAs  
92 or due to a selection event occurring after association.

93

94 Colocalization single molecule spectroscopy (CoSMoS) has previously been used to  
95 study the kinetics of both yeast and human U1/RNA interactions in cell extracts (Braun et al.,  
96 2018; Hoskins et al., 2011; Larson and Hoskins, 2017; Shcherbakova et al., 2013). In all cases,  
97 short (<60 s) and long-lived (>60 s), 5' SS-dependent interactions were observed between U1  
98 and immobilized pre-mRNAs. In previous work from our laboratory with yeast U1 in whole cell  
99 extract (WCE), we showed how the populations of short- and long-lived interactions as well as  
100 their lifetimes can vary depending on the presence of a consensus or weak (containing additional  
101 mismatches) 5' SS or due to mutation of Yhc1 (Larson and Hoskins, 2017). These interactions  
102 were also strongly influenced by the presence or absence of *trans*-acting factors that bind  
103 elsewhere on the pre-mRNA, including the nuclear cap-binding complex (CBC) or the branch  
104 site bridging protein (BBP)/Mud2 complex, that together with U1 form the yeast E complex  
105 spliceosome or commitment complex (Larson and Hoskins, 2017; Séraphin and Rosbash, 1991,  
106 1989). Our results were consistent with a two-step mechanism for 5' SS recognition by U1 that  
107 involves reversible formation of an initial weakly bound complex with RNA that can transition to  
108 a more stably bound state, as was proposed previously by others (Du et al., 2004; McGrail and  
109 O'Keefe, 2008). Yet, neither our prior experiments nor those from other laboratories could  
110 exclude roles for other, non-U1 splicing factors present in the WCE in this process or potential  
111 influence of pre-mRNA structure on the observed kinetics.

112 In this study, we use CoSMoS to directly observe how individual yeast U1 snRNP  
113 molecules interact with short RNA oligos. The short- and long-lived interactions observed in cell  
114 extracts with large pre-mRNA substrates are also observed when purified U1 snRNP binds  
115 cognate RNAs providing direct evidence for these kinetic features being inherent to 5' SS  
116 recognition. By using RNA oligos with varying base-pairing strength to the snRNA as well as  
117 with different locations and types of mismatches, we show that 5' SS recognition occurs  
Hansen, et al.

118 subsequent to binding. RNAs with limited pairing to the SSRS are released quickly after  
119 association while those with extended complementarity and pairing at certain positions are more  
120 likely to be retained and form long-lived complexes. Significantly, formation of long-lived U1/RNA  
121 complexes does not always correlate with the predicted thermodynamic stabilities of the SSRS/5'  
122 SS RNA duplexes. We propose that U1 uses a multi-step kinetic pathway to discriminate  
123 between RNAs and that formation of long-lived complexes is dependent on multiple factors that  
124 together favor U1 accumulation on introns competent for splicing.

## 125 **RESULTS**

### 126 **U1 forms Short- and Long-Lived Complexes with RNAs Containing a 5' SS Sequence**

127 Since we wished to study U1/5' SS interactions in the absence of *trans*-acting factors, we  
128 first developed a protocol for purifying fluorophore-labeled U1 snRNP from yeast extract. We  
129 genetically encoded a tandem-affinity purification (TAP) tag on the U1 protein Snu71 and a  
130 SNAP-tag on the U1 protein Snp1 in a protease-deficient, haploid yeast strain (**Fig. 1A**). TAP-  
131 tagged Snu71 has previously been used to purify U1 snRNP (Feltz and Krummel, 2016; Rigaut  
132 et al., 1999), and SNAP-tagged Snp1 has been used to fluorescently label and visualize U1  
133 binding events by single molecule fluorescence in WCE (Hoskins et al., 2011; Larson and  
134 Hoskins, 2017). Extracts were prepared from the dual-tagged strain, and U1 snRNP purified  
135 using published protocols (Feltz and Krummel, 2016). Fluorophore labeling was carried  
136 concertedly with TEV protease cleavage of the TAP tag, and excess fluorophore was removed  
137 during calmodulin affinity purification. In these experiments, a tri-functional SNAP-tag ligand  
138 containing a Dy649 fluorophore, biotin, and benzyl-guanine leaving group (Smith et al., 2013)  
139 was used to simultaneously fluorophore label and biotinylate U1 on the Snp1 protein.

140 Purified U1 was characterized by mass spectrometry, and samples contained all known  
141 U1 components (**Fig. 1-Supplement 1**). Only a small number of peptides from other yeast  
142 splicing factors were identified, and these were not present in all replicates. Dideoxy sequencing  
Hansen, et al.

143 of the isolated U1 confirmed the presence of the snRNA and SSRS, and the purified U1 was  
144 able to restore the splicing activity of WCE in which the endogenous U1 was degraded by  
145 targeted RNase H cleavage of the snRNA (Du and Rosbash, 2001) (**Fig. 1-Supplement 2**).  
146 Together the data support purification of functional U1 particles.

147 For substrates, we designed a set of Cy3-labeled, 29 nucleotide (nt)-long RNA  
148 oligonucleotides with varying degrees of complementarity to U1 (**Fig. 1-Supplemental Table 1**).  
149 The RNAs are based on the RP51A pre-mRNA 5' SS sequence, a well-studied splicing substrate  
150 (Hoskins et al., 2011; Larson and Hoskins, 2017; Rymond and Rosbash, 1985) and are identical  
151 except for substitutions within the 5' SS region. Importantly, the RNAs contain the entire region  
152 known to cross-link with the U1 snRNA (McGrail and O'Keefe, 2008) and all U1-interacting nt  
153 that could be modeled into cryo-EM densities of the spliceosome E and A complexes (the ACT1  
154 intron stem loop observed in E complex being an exception) (Li et al., 2019; Plaschka et al.,  
155 2018). The RNAs contain all of the sites shown to cross-link with U1 snRNP proteins with the  
156 exception of non-conserved poly-U tracts located downstream of the 5' SS (+27-46) that likely  
157 interact with the RRM domains of Nam8 (Plaschka et al., 2018; Puig et al., 1999; Zhang and  
158 Rosbash, 1999). We omitted this region to avoid potential interferences from 5' SS-independent  
159 RRM/RNA interactions and folding of larger RNA substrates into structures that could compete  
160 with U1 interactions. The RNAs are predicted to have minimal stable secondary structure by  
161 mFold (Zuker, 2003) and range from limited complementarity with U1 (no more than two  
162 predicted contiguous base pairs; **Fig. 1-Supplemental Table 1**, RNA-Control or RNA-C) to a  
163 maximum of 10 contiguous potential base pairs (RNA-10).

164 We immobilized the purified U1 snRNP with streptavidin on a passivated and biotinylated  
165 glass slide (Salomon et al., 2015) and readily observed single spots of fluorescence from the  
166 Dy649 fluorophore upon excitation at 633 nm (**Fig. 1B**). When a 29-nt RNA oligo containing a  
167 consensus 5' SS and Cy3 fluorophore (RNA-4+2) was introduced, spots of Cy3 fluorescence  
Hansen, et al.



168 began to transiently appear on the surface (**Fig. 1B, C**). The spots of Cy3 fluorescence co-  
169 localized with the immobilized U1 molecules, and spots repeatedly appeared and disappeared  
170 from the same U1 molecule. This is consistent with multiple rounds of binding and release of the  
171 RNA-4+2 oligo during the experiment. As a control, we added a Cy3-labeled oligo which lacked  
172 any significant complementarity to U1 (**Fig. 1-Supplemental Table 1 RNA-C**). We observed few  
173 Cy3 signals on the surface, and the event density (frequency of co-localized binding events) of  
174 RNA-C was 40-fold less than that of RNA-4+2 (**Fig. 1-Supplemental Fig. 3**). While it is possible  
175 that non-specific interactions between RNA-C and U1 occurred too rapidly for us to detect, the  
176 large differences in event density between RNA-C and RNA-4+2 indicate that the vast majority  
177 of the detected binding events represent sequence specific interactions.

178 We analyzed the dwell time distribution of the RNA-4+2 binding events and were able to  
179 fit the data to a function containing two exponential terms (**Fig. 1D**). This is consistent with the  
180 appearance of both short- and long-lived binding events observed in the time trajectories of  
181 single U1 molecules (**Fig. 1C**). The short-lived kinetic parameter ( $\tau_1$ ) was  $\sim 12$  s with an  
182 amplitude of 0.9, while the long-lived kinetic parameter ( $\tau_2$ ) was much larger ( $\sim 204$  s) but with a  
183 smaller amplitude (0.1). Previous analysis of U1 binding events on immobilized RP51A pre-  
184 mRNAs in yeast WCE also resulted in multi-exponential dwell time distributions (Hoskins et al.,  
185 2011; Larson and Hoskins, 2017). The exponential fits of dwell times for RNA-4+2 binding to  
186 purified, immobilized U1 snRNP and for U1 snRNP binding to immobilized RP51A pre-mRNAs  
187 containing the same 5' SS have similar parameters (Larson and Hoskins, 2017). In both cases,  
188 the majority of binding events are short-lived and with lifetimes of  $\sim 12$  s. In WCE without ATP,  
189 the long-lived kinetic parameter was smaller (64 vs. 204 s) but with a larger amplitude (0.3 vs.  
190 0.1). Longer binding events of  $\sim 200$  s were observed in WCE with this 5' SS but only when  
191 either CBC or BBP were also capable of binding the pre-mRNA.

192 Together, our data indicate that short- and long-lived interactions with RNA substrates  
193 are an inherent property of U1. Since we purified and immobilized U1 and studied its interactions  
194 with small RNAs, the diversity of binding events cannot solely originate from the influence of  
195 *trans*-acting factors present in a WCE or folding/unfolding of large RNA substrates. We do not  
196 exactly know how these factors influence U1 binding in complex environments, but they may be  
197 the origins of differences we observed between experiments carried out with purified U1 and  
198 with U1 present in WCE.

### 199 **Base Pairing Potential Accelerates U1/RNA Complex Formation**

200 We next systematically studied how the base-pairing potential of the RNA oligo influenced  
201 binding by U1 snRNP. We carried out single molecule binding assays with RNAs capable of  
202 forming between 4 and 10 contiguous base pairs with the snRNA (**Fig. 2A**). All of these  
203 substrates can form base pairs at the highly conserved G+1 and U+2 positions of the 5' SS, and  
204 we extended base pairing outwards from these positions towards the 5' and 3' ends of the SSRS.  
205 For several positions we also varied the duplex position with pairing extending away from or  
206 towards the 5' end of the U1 snRNA without altering the number of potential base pairs (RNA-  
207 6a vs. -6b, for example).

208 When the number of binding interactions to immobilized U1 and the apparent association  
209 rates were measured, the RNA oligos exhibited two distinct classes of behavior. In the first  
210 class, RNA oligos capable of forming <6 contiguous base pairs showed very few colocalized  
211 binding events with U1 (**Fig. 2B**). While these oligos may have been able to form sequence-  
212 specific interactions with U1, these interactions were either too rapid or infrequent for us to  
213 observe. The few measurable events were essentially indistinguishable in frequency to  
214 background binding of RNA-C. RNAs capable of forming  $\geq 6$  contiguous base pairs exhibited a  
215 second class of behavior. These RNAs had a 100-fold increase in detectable U1 binding event  
216 density compared to RNAs in the first class (**Fig. 2B**). The dependence of the event density on

217 the number of potential base pairs with the snRNA supports that the interactions are not only  
218 sequence dependent (**Fig. 1**) but are also due to interactions with the U1 SSRS.

219 For RNAs with detectable U1 binding, we were able to calculate the observed association  
220 rate ( $k_{\text{association}}$ ) to U1 under these conditions (**Fig. 2C, Fig. 2-Supplemental Table 1**). RNAs  
221 capable of forming more potential base pairs with U1 bound more quickly. The correlation of the  
222 association rate with extent of base pairing could be due to RNAs with greater complementarity  
223 also having a greater probability of nucleating duplex formation due to the increased number of  
224 possible toeholds or short stretches of pairing interactions. This hypothesis is consistent with  
225 previous single molecule fluorescence resonance energy transfer studies and ensemble  
226 measurements of DNA and RNA oligo hybridization that show nucleation of nucleic acid duplex  
227 formation by base pairing interactions of only 2-4 nt in length (Cisse et al., 2012; Craig et al.,  
228 1971; Marimuthu and Chakrabarti, 2014; Wetmur, 1991; Wetmur and Davidson, 1968).

229 Additionally, we observed that oligos capable of pairing towards the 3' end of the SSRS  
230 formed observable complexes more quickly than those where the pairing was shifted towards  
231 the 5' end (**Fig. 2C**, RNAs 6a, 7a, and 8a vs. 6b, 7b, 8b). This indicates that the 3' end of the  
232 SSRS might be either more accessible to the RNAs or can more easily facilitate nucleation of  
233 RNA interactions that lead to the observable binding events. This latter possibility may be related  
234 to the increased calculated thermodynamic stability of duplexes with pairing interactions closer  
235 to the 3' end of the SSRS due to the presence of a G/C pair in this region: RNAs 6a and 7a are  
236 predicted to form more stable duplexes than RNAs 6b and 7b (**Fig. 2A**).

### 237 **The Abundance of Short- and Long-Lived U1/RNA Complexes Depends on Base Pairing**

238 We next studied the dwell times with U1 for the same series of RNA oligos. By visually  
239 inspecting the individual fluorescence time trajectories, we were immediately struck by apparent  
240 differences in binding behaviors. We observed predominantly very long dwell times with RNAs

241 capable of forming a large number of base pairs with U1 (**Fig. 3A, RNA-10**), very short dwell  
242 times with RNAs capable of only forming a small number of base pairs (**RNA-6a**), and a mixture  
243 of short and long dwell times for RNAs capable of forming an intermediate number of base pairs  
244 (**RNA8a**). When the individual dwell times from each experiment were combined and analyzed  
245 using probability density histograms and fits to exponential equations, the resulting plots and  
246 kinetic parameters confirmed these observations (**Fig. 3B**). RNA-10 is capable of forming 10  
247 base pairs with U1 and the distribution of dwell times for RNA-10 on U1 is best fit using a single  
248 exponential term ( $\tau \approx 178$  s, **Figure 3-Supplemental Table 1**), consistent with long-lived binding.  
249 RNA-6a is capable of only forming 6 base pairs with U1 and its distribution of dwell times could  
250 also be fit using only a single exponential ( $\tau \approx 12$  s), consistent with short lived binding. RNA-8a  
251 can make up to 8 base pairs with U1 and its dwell times were best fit using an equation with two  
252 kinetic parameters describing short- ( $\tau \approx 41$  s) and long-lived binding events ( $\tau \approx 133$  s).

253 When we examined all of the RNAs in this series (**Fig. 2A**), we observed a trend: RNAs  
254 capable of forming few base pairs with U1 exhibited predominantly short-lived dwell times  
255 (defined here as  $\tau_S < 60$  s) with a small fraction of long-lived ( $\tau_L > 60$  s) binding events and  
256 correspondingly small amplitude for the long-lived kinetic parameter (**Fig. 3C**). As the number  
257 of potential base pairs increased, so did the amplitude of  $\tau_L$ . It is unlikely that these results arose  
258 from presence of two subpopulations of U1 snRNPs in our experiments (one capable of only  
259 making short-lived interactions and one capable of only making long-lived interactions) since we  
260 would not expect these subpopulations to change in abundance between experiments carried  
261 out with the same preparations of U1.

262 Instead, these data are most consistent with a simpler mechanism in which U1  
263 association with RNAs involves two steps and formation of short-lived intermediate (**Fig. 3F**). All  
264 RNAs that we can observe interacting with U1 (those capable of making  $\geq 6$  base pairs) are

265 capable of forming the short-lived complex. RNAs with a limited number of base pairs (i.e.,  
266 RNAs-6a, 6b) rarely progress through the second step to form the long-lived complex and most  
267 often dissociate from the intermediate state. On the other hand, RNAs with a large number of  
268 base pairs (RNAs-9a, 10) transition to the long-lived complex much more frequently than they  
269 dissociate from the intermediate. RNAs with in-between numbers of base pairs (e.g., RNAs-8a,  
270 8b) face a competition between dissociation from the intermediate and formation of the long-  
271 lived complex.

272 Finally, it is interesting to note that RNAs in which the base pairing extends to the 3' end  
273 of the SSRS (**Fig. 3C**, RNAs 8a and 9a) also had higher fitted amplitudes for the long-lived state  
274 than those capable of forming the same number of base pairs but not reaching the 3' end of the  
275 SSRS (RNAs 8b and 9b). This suggests that pairing within the 3'-most nt of the SSRS closest  
276 to the zinc finger of Yhc1 is not only important for increasing the rate of U1 binding but also  
277 contributes to formation of the longest-lived U1/RNA complexes. Combined, these results  
278 support formation of a short-lived, intermediate between U1 and RNAs that is dependent on  
279 base pairing for its formation. The RNA can then dissociate from this intermediate or the U1/RNA  
280 complex can transition to more tightly bound state.

### 281 **Some U1/5' SS Duplexes are Destabilized in the U1 snRNP**

282 In addition to the amplitudes of the short- and long-lived parameters, we also determined  
283 their values from the fits to the dwell time data (**Fig. 3D, E**). The short-lived dwell time parameter  
284 ( $\tau_S$ ) ranged from 12 – 48s for RNA oligos capable of forming 6 – 9 contiguous, potential base  
285 pairs. The long-lived dwell time parameter ( $\tau_L$ ) ranged from 133 – 288s for RNA oligos capable  
286 of forming 7 – 10 base pairs. For both parameters, RNAs capable of forming more base pairs  
287 also tended to have longer dwell times. However, this relationship did not hold true in all cases:  
288 RNA-9b and RNA-10 have similar values of  $\tau_L$  despite the presence of an additional potential

289 base pair. Both the  $\tau_S$  and  $\tau_L$  parameters only varied within a range of 2- to 4-fold, which was  
290 surprising since a previous single molecule fluorescence study of RNA oligo hybridization  
291 reported a 10-fold decrease in off-rate due to presence of one additional base pair (Cisse et al.,  
292 2012).

293 It is possible that the particular properties of the RNA oligos we used in these studies  
294 contributed to the small range in  $\tau_S$  and  $\tau_L$  we determined. To test this, we constructed a RNA-  
295 only mimic of the U1 SSRS (**Fig. 4A**). In this case, binding kinetics would only be influenced by  
296 the nucleic acid complexes being formed and not be influenced snRNP proteins or structural  
297 constraints imposed by U1. Unlike U1 snRNP, the surface-immobilized mimic did not efficiently  
298 bind to the RNA oligos when they were present in solution at nM concentrations (the upper  
299 concentration limit of our single-molecule assay). So, we instead pre-annealed each oligo to the  
300 mimic and then measured its off-rate by monitoring disappearance of colocalized oligo  
301 fluorescence signals over time (**Figs. 4A,B**).

302 For each of the RNAs, we were able to fit the dissociation data to equations containing a  
303 single exponential term (**Fig. 4-Supplemental Table 1**). This signifies that the RNAs are  
304 dissociating in a single observable step from the immobilized mimic and that dissociation was  
305 occurring from only a single type of RNA/mimic complex. The single exponential kinetics are in  
306 contrast with results obtained for many of the same RNAs with U1 snRNP, for which multi-  
307 exponential kinetic equations were required to fit the dwell time data (RNA-7a,b; 8a,b; and 9a).  
308 This was true for both a mimic that, like U1, contains pseudouridines in the SSRS as well as for  
309 one with uridine substitutions at those positions. Thus, the dissociation pathways for a given  
310 RNA oligo are not identical between the RNA-only mimic and the U1 snRNP under these two  
311 experimental conditions.

312 In addition to differences in the dissociation pathways, the amount of time the oligos  
313 remained bound differed dramatically between the RNA mimic and U1. Dissociation rates from  
314 the mimic varied linearly with base pairing potential over 20-fold, a larger range than for binding  
315 of the same oligos to U1 snRNP (**Fig. 4C**). Surprisingly, the lifetimes of many of the RNAs bound  
316 to the mimic were also much longer than their lifetimes bound to U1. For example, RNA-10 had  
317 a dissociation rate of  $5.5 \times 10^{-4} \text{ s}^{-1}$  when bound to the pseudouridine-containing mimic. This  
318 corresponds to an average lifetime of 1,818 s—more than 10-fold larger than the  $\tau_L$  obtained for  
319 binding of the same RNA to U1. From these observations we conclude that some U1/5' SS  
320 duplexes can be destabilized in the context of the U1 snRNP. Thus, the lifetimes of U1/5' SS  
321 interactions in the snRNP cannot be predicted from base-pairing potential or studies of model  
322 RNA duplexes alone.

### 323 **Long-Lived U1/RNA Interactions Are Sensitive to the Location and Type of Mismatches**

324 Splice sites with perfect and uninterrupted complementarity to U1 are very rare in yeast.  
325 In fact, only 14 annotated 5' SS in yeast contain 6 contiguous base pairs (corresponding to RNA-  
326 6b) and only one (a cryptic 5' SS in RPL18A) may contain more than 7 contiguous base pairs  
327 (Grate and Ares, 2002). Most 5' SS are interrupted by one or more mismatches in  
328 complementarity to the U1 snRNA. We next tested how these mismatches impacted interactions  
329 of the RNA oligos with U1 snRNP. We analyzed and compared the binding interactions of RNAs  
330 capable of forming various numbers of contiguous base pairs between U1 SSRS nt +3 to +9.  
331 We incorporated mismatches systematically at each position resulting in RNAs that can form  
332 uninterrupted duplexes of 7 or 6 base pairs (RNAs-7a, 6a, 6b) or interrupted duplexes of a total  
333 length of 7 nucleotides (**Fig 5A**). One of the RNA oligos within this comparison group contains  
334 the U1 consensus 5' SS found within the well-spliced RP51A transcript (**RNA-4+2, Fig. 5A**).

335 Within this group, the mismatches result in a range of predicted duplex stabilities from -0.4 – 9.1  
336 kcal/mol (**Fig. 5**).

337 We observed long-lived complexes for RNA-7a, which has a 7 bp predicted duplex length,  
338 and only short-lived complexes for RNA-6a and -6b, which have only 6 bp predicted duplex  
339 lengths (**Fig. 5B**; replotted from **Fig. 3D, E**). Whether or not RNAs containing mismatches that  
340 disrupt the duplex with the SSRS showed long-lived interactions (like RNA-7a) or only short-  
341 lived interactions (like RNA-6a, 6b) depended the position of the mismatch. Neither RNA oligos  
342 containing a C/C mismatch at the +1 site nor an A/A mismatch at the +2 site were able form  
343 long-lived complexes with U1. However, RNA oligos containing U/U mismatches at +3 or +4 or  
344 a C/C mismatch at +5 could form long lived complexes (**Fig. 5B**). From these data we conclude  
345 that long-lived complex formation is sensitive to the tested mismatches at some positions (+1,  
346 +2) and not others (+3, +4) within a substrate of 7bp end-to-end length. In addition, the same  
347 type of mismatch (C/C) could either prevent or permit long-lived complex formation depending  
348 on its position within the 7bp duplex. As a consequence, formation of long-lived U1/5' SS  
349 interactions does not correlate with predicted duplex stabilities (*cf.*, RNA-5+1 vs. RNA-2+4, 6a,  
350 or 6b in **Fig. 5B**).

### 351 **Long-Lived U1/RNA Interactions Depend on Base Pairing at the G+1 Position of the 5' SS**

352 We next tested if a single mismatch could eliminate long-lived binding even if all other  
353 positions within the 5' SS oligo could potentially pair with SSRS. We incorporated single  
354 mismatches at the +1 position of RNA-10 (**Fig. 6A**). This results in a mismatch at the first  
355 position of the highly conserved 5' SS GU. All RNAs containing a mismatch at +1 were able to  
356 associate with U1 at rates ~100-fold greater than background binding by RNA-C (**Fig. 6B**).  
357 However, none of them were able to form appreciable amounts of the long-lived complex (**Fig.**  
358 **6C**). The observed distributions of dwell times for RNAs containing mismatches at +1 could still



359 be best fit to two exponential distributions containing short- and long-lived parameters (**Fig. 6-**  
360 **Supplemental Table 1**). However, the amplitudes of the long-lived parameters were very small  
361 as expected from the scarcity of the long-lived events. Consistent with data shown in **Fig. 5**, the  
362 predicted thermodynamic stabilities again did not correlate with observation of the long-lived  
363 complexes. For example, RNA-2+7 (A+1) containing a A/C mismatch at the +1 position is  
364 predicted to form a more stable duplex than RNA 5+1 ( $\Delta G^\circ$  -4.4 vs. -2.7 kcal/mol). Yet, the  
365 amplitude of the long-lived parameter for RNA 5+1 is ~14x greater than that for RNA-2+7 (A+1).  
366 These results show that long-lived complex formation between U1 and the RNA oligos is  
367 intolerant of mismatches at the +1 position. Failure of U1 to accumulate on RNAs with  
368 mismatches at the +1 site is not due to lack of association. Rather, recognition of a mismatch at  
369 +1 involves a discrimination step occurring after association and mismatched RNAs are rapidly  
370 released.

## 371 **Discussion**

372 By studying single molecules of yeast U1 snRNPs interacting with a diverse range of RNA  
373 oligos, our experiments have revealed the dynamics associated with the earliest step of 5' SS  
374 recognition. U1 can form both short and long-lived, sequence-dependent complexes with RNAs  
375 (**Figs. 1, 3**). RNA binding is accelerated by increased numbers of potential base pairs as well as  
376 by their positioning closer to the 3' end of the SSRS—the same region in which the Yhc1 and  
377 Luc7 proteins contact the 5' SS/SSRS duplex (Kondo et al., 2015; Krummel et al., 2009; Li et  
378 al., 2017; Plaschka et al., 2018) (**Fig. 2**). Sequence-dependent interactions with lifetimes of  
379 several seconds are only observed with oligos capable of forming duplexes of at least 6 bp in  
380 length (**Fig. 2**) while additional potential base-pairing increases the probability of forming long-  
381 lived interactions lasting several minutes (**Fig. 3**). Relative to an RNA-only mimic, U1 snRNP  
382 binds freely diffusing oligos more readily when they are present at nM concentrations and

383 accelerates the release of RNAs capable of forming the largest number of potential base pairs  
384 (**Figs. 3, 4**), indicating that snRNP proteins and/or U1 snRNA structure can destabilize the  
385 SSRS/5' SS duplex. Formation of long-lived interactions is dependent on the position of  
386 mismatches as well as pairing at the G+1 position rather than predicted thermodynamic  
387 stabilities of the RNA duplexes (**Fig. 5, 6**).

388         These results support a reversible multi-step binding process in which U1 first forms  
389 sequence-dependent short-lived interactions with RNAs via the SSRS and then transitions to a  
390 more stably bound complex if certain requirements are met (**Fig. 3F**). This agrees with previous  
391 single molecule experiments with U1 in WCE (Larson and Hoskins, 2017) and biochemical  
392 studies of the temperature dependence of yeast U1/RNA interactions (Du et al., 2004) while  
393 providing further details of the 5' SS recognition process in the absence of *trans*-acting factors  
394 or confounding effects due to RNA secondary structures. We have not yet identified what specific  
395 event or conformational change is associated with long-lived complex formation; however,  
396 comparison of cryo-EM densities for free yeast U1 and the U1/U2-containing yeast pre-  
397 spliceosome (in which U1 is bound to a 5' SS) reveals that Yhc1 and Luc7 are more ordered in  
398 the latter (Li et al., 2017; Plaschka et al., 2018). It is possible that a disorder-to-ordered  
399 conformational change for Yhc1 and Luc7 results in the short- to long-lived transition inferred  
400 from our single molecule assays. Mismatches at particular positions such as G+1 may inhibit  
401 this transition and/or prevent formation of stable contacts between the two proteins or with the  
402 RNA. In agreement with the importance of potential Yhc1/Luc7 contacts, mutants of Luc7 located  
403 at the Yhc1 interface exhibit numerous genetic interactions with U1 snRNP proteins and splicing  
404 factors involved in E complex formation (Agarwal et al., 2016; Li et al., 2019). We also note that  
405 interactions between U1 proteins and RNA sequences or structures not included in these

406 experiments, such as RNA hairpins or binding sites for Nam8 (Li et al., 2019; Plaschka et al.,  
407 2018), may influence this process to further tune U1 binding on specific transcripts.

### 408 **Checkpoints during 5' SS Recognition**

409 Combined, our data also indicate that binding involves several checkpoints before long-  
410 lived complexes are formed (**Fig. 7**). By analogy, 5' SS recognition is similar to “multi-factor  
411 authentication” processes that are commonly used to verify identities on-line. The initial barrier  
412 to forming short-lived complexes is low and requires limited complementarity to the SSRS.  
413 Formation of this complex is readily reversible which permits rapid surveillance of transcripts by  
414 U1 for 5' SS and prevents accumulation of U1 on RNAs lacking features necessary for splicing.

415 Passage to the long-lived complex is more stringent and dependent on a G nucleotide at  
416 the +1 position as well as increased complementarity. It is likely that the need for pairing with  
417 G+1 evolved in U1 due to the importance of this nucleotide in splicing chemistry since G+1 at  
418 the 5' SS must form a non-Watson Crick pair with G-1 at the 3' SS during exon ligation (Parker  
419 and Siliciano, 1993; Plaschka et al., 2019; Yan et al., 2019). Thus, U1 binding kinetics prioritize  
420 identification of a nucleotide used for splicing chemistry even though U1 itself does not  
421 participate in those steps.

422 Interestingly, we found that formation of the long-lived state often correlated with  
423 predicted duplex length more so than predicted duplex stability (**Fig. 5**, RNA-5+1 vs. RNA 6a or  
424 6b, for example). This suggests 5' SS recognition involves a “molecular ruler” similar to those  
425 observed in other RNPs (Kwon et al., 2016; MacRae et al., 2006). From our data, we would  
426 predict that U1 uses this ruler activity to preferentially form long-lived interactions with RNA  
427 duplexes  $\geq 7$  bp in end-to-end length. In terms of U1 snRNP structure, duplexes of 6-7 bp in  
428 length are needed to span the distance between the zinc finger of Yhc1 to the second zinc finger

429 of Luc7 and the Yhc1/Luc7 interface (Li et al., 2019)—suggesting a role for duplex length in  
430 conformational changes or intermolecular contacts associated with stable 5' SS binding.

431 A duplex length requirement of at least 7 bp is surprising since the consensus sequence  
432 of the 5' SS indicates only 6 highly conserved positions (**Fig. 7B**). How then would most natural  
433 5' SS in yeast be able to stably bind U1? When predicted end-to-end duplex lengths between  
434 the SSRS and yeast 5' SS are analyzed, rather than their specific nucleotide sequences, it is  
435 apparent that the over-whelming majority of 5' SS are capable of forming extended duplexes  
436 with U1 with the caveat that these duplexes may contain one or more internal mismatches (**Fig.**  
437 **7C**). Consequently, we would predict that most yeast 5' SS are able to meet duplex length  
438 requirements for long-lived complex formation.

439 It is likely that non-U1 splicing factors can permit bypass of the molecular ruler to facilitate  
440 accumulation of U1 on weak SS. As an example of bypass, we previously observed that pre-  
441 mRNAs containing a weak 5' SS with only a 5 bp end-to-end length can form long-lived  
442 complexes with U1 in WCE but only when either the CBC or BBP/Mud2 could also bind the pre-  
443 mRNA (Larson and Hoskins, 2017). One limitation of our model is that we do not yet know if  
444 these *trans*-acting factors can also bypass the need for pairing with G+1 in the assays used  
445 here. Regardless, it is notable that only the branch site-binding factors, BBP/Mud2, increased  
446 the probability of long-lived complex formation and not just its lifetime (Larson and Hoskins,  
447 2017). This is consistent with the idea that retention of U1 on transcripts is governed through  
448 direct and indirect interactions with intronic sequences involved in splicing chemistry including  
449 both the 5' SS and branch site.

#### 450 **Base Pairing Potential Does Not Predict U1 Interaction Kinetics**

451 Our data show that the lifetime of the U1/5' SS interaction cannot be predicted based on  
452 the thermodynamic stability of the base pairing interactions alone. Rather, strong positional  
Hansen, et al.

453 effects lead to prioritization of base pairing at particular positions for stable retention of U1 (**Figs.**  
454 **5, 6**). How kinetic stability of U1 at a particular 5' SS correlates with its subsequent use by the  
455 spliceosome has not yet been determined. If 5' SS usage does correlate with U1 lifetimes, then  
456 our results would be in strongest agreement with computational models for 5' SS identification  
457 that take into account positional effects and interdependencies rather than simply the  
458 thermodynamic stabilities of the predicted base pairs (Roca et al., 2013; Yeo and Burge, 2004).

459         Since failure to release U1 can inhibit splicing (Staley and Guthrie, 1999), we would  
460 expect that optimal promotion of splicing by yeast U1 would occur by balancing its recruitment  
461 and retention with release. This “Goldilocks” model has previously been proposed for 5' SS  
462 recognition by human U1 (Chiou et al., 2013). Interestingly, we observed that the lifetimes of the  
463 longest-lived U1/RNA complexes were similar to one another (**Fig. 3, 5**) and lifetimes of the  
464 RNAs capable of making 9 or 10 base pairs were much shorter when bound to U1 than expected  
465 based on their off-rates from a RNA mimic of the SSRS (**Fig. 3, 4**). U1 may equilibrate its  
466 interactions with 5' SS by both stabilizing and destabilizing RNA duplexes. As a result, U1’s  
467 interactions with sequence-diverse substrates may all be “just right” for subsequent steps in  
468 splicing. This, in turn, may impact the ATP requirement for U1 release during activation (Staley  
469 and Guthrie, 1999).

## 470 **Implications for Human 5' SS Recognition**

471         While much of the catalytic machinery of the spliceosome is well-conserved between  
472 yeast and humans, we do not yet know if the mechanism of 5' SS recognition we propose also  
473 holds true for human U1. Chemical probing data of human U1 revealed allosteric modulation of  
474 the SSRS based on positioning of splicing regulatory elements (Shenasa et al., 2020). Differing  
475 conformations of the SSRS could lead to differences in binding behavior and give rise to short-  
476 or long-lived binding interactions similar to those we observe with yeast U1. Whether or not the

477 SSRS of yeast U1 displays similar changes in conformation has not been determined. Ensemble  
478 binding data for human U1/RNA interactions also revealed a strong preference for formation of  
479 stable complexes on pairing at the G +1 site as well as position- and mismatch-dependent effects  
480 at other locations (Kondo et al., 2015; Tatei et al., 1987). This is in agreement with our single  
481 molecule data on yeast U1 interactions. While it is possible that yeast and human U1 may have  
482 differing pathways for splice site recognition, the outcome of longer-lived binding on particular  
483 RNA sequences may be the same.

484 Finally, the large number of non-obligate accessory factors that associate with human U1  
485 may yield highly malleable pathways for RNA binding. Different factors may tune 5' SS  
486 recognition by a holo-U1 complex to yield distinct kinetic mechanisms. This in turn could lead to  
487 enhancement or repression of U1 accumulation at particular sites or functional differences  
488 between U1 complexes involved in splicing or telescripting (Kaida et al., 2010; Oh et al., 2017).  
489 The mechanism we propose for yeast U1 may be most relevant for the subset of human U1  
490 snRNPs that associate with alternative splicing factors such as LUC7L or PRPF39 that are  
491 homologs of obligate components of the yeast U1 snRNP (Li et al., 2017).

## 492 **General Features of Nucleic Acid Recognition by RNPs**

493 Other cellular RNPs face similar challenges as U1 in finding specific nucleotide  
494 sequences and preventing accumulation on close cognates. While Cas9 (involved in bacterial  
495 CRISPR-based immunity), Hfq (involved in bacterial small RNA regulation) and Argonaute  
496 (AGO, involved in mRNA repression and silencing) RNPs are involved in very different biological  
497 processes than RNA splicing, single molecule studies of each of these RNPs reveal striking  
498 similarities with yeast U1 (Globyte et al., 2019; Małecka and Woodson, 2021; Salomon et al.,  
499 2015; Sternberg et al., 2014). All of these RNPs exhibit kinetic behaviors that lead to prioritization  
500 of certain sequences over others and are distinct from “all-or-nothing” models for hybridization

501 of nucleic acids in the absence of proteins (Cisse et al., 2012; Wetmur, 1991; Wetmur and  
502 Davidson, 1968). In the cases of AGO and Cas9, correct base pairing with the micro-RNA seed  
503 sequence (AGO) or PAM (Cas9) is necessary for fast and stable binding. Rapid reversibility of  
504 this interaction ensures that these RNPs can dissociate and find other targets if mismatches are  
505 detected within the priority region. Additional base-pairing with the target then leads to the most  
506 stable binding interaction, consistent with binding occurring in multiple steps. These results are  
507 analogous to reversible interrogation of RNAs by U1 that prioritizes pairing at the G+1 site and  
508 formation of extended duplexes for stable interaction. Cas9 also accelerates target search by  
509 diffusion along DNA molecules (Globyte et al., 2019; Sternberg et al., 2014). While this has not  
510 been directly tested with U1, tethering of U1 to the pol II transcription machinery (Kotovic et al.,  
511 2003; Zhang et al., 2021), rather than RNAs themselves, may lead to similar acceleration in  
512 binding site identification.

### 513 **Funding**

514

515 This work was supported by the National Institutes of Health (R01 GM 122735 and R35  
516 GM136261 to AAH and R35 GM126914 to LMS and MS). SRH was supported in part by the  
517 NIH Chemistry-Biology Interface Training Grant (T32 GM008505).

### 518 **Competing Interests**

519 AAH is conducting sponsored research with and a scientific advisor for Remix Therapeutics, Inc.

520

### 521 **Acknowledgements**

522 We thank Boehm, Gehring, et al. whose work on “two-factor authentication” of nonsense-  
523 mediated mRNA decay inspired our multi-factor authentication model

524 (<https://www.biorxiv.org/content/10.1101/2020.07.07.191437v1>). We thank David Brow, Sam

525 Butcher, Joshua Larson, Margaret Rodgers, and Tucker Carrocci for critical reading of the

526 manuscript. We thank Clarisse van der Feltz and Daniel Pomeranz Krummel for assistance in  
 527 U1 snRNP purification.

528

## 529 **Methods**

### 530 **Key resources and materials**

| <b>REAGENT or RESOURCE</b>                                                         | <b>SOURCE</b>                | <b>IDENTIFIER</b>                 |
|------------------------------------------------------------------------------------|------------------------------|-----------------------------------|
| <b>Chemicals, Peptides, and Recombinant Proteins</b>                               |                              |                                   |
| RNasin® Ribonuclease Inhibitor                                                     | Promega                      | Cat No. N2611                     |
| Pierce Protease Inhibitor Tablet                                                   | ThermoFisher Scientific      | Cat No. A32965                    |
| TEV Protease                                                                       | Sigma Aldrich                | Cat No. T4455                     |
| BG-649-PEG-biotin                                                                  | (Smith et al., 2013)         |                                   |
| m7G(5')ppp(5')G RNA Cap Structure Analog                                           | New England BioLabs          | Cat No. S1404S                    |
| AMV Reverse Transcriptase                                                          | Promega                      | Cat No. M5101                     |
| RNaseH (2U/μL)                                                                     | ThermoFisher Scientific      | Cat No. 18021014                  |
| Vectabond                                                                          | Fisher Scientific            | Cat No. NC9280699                 |
| Biotin-PEG-SVA (MW 5,000)                                                          | Laysan Bio                   | Cat No. Biotin-PEG-SVA-5000-100mg |
| mPEG-SVA (MW 5,000)                                                                | Laysan Bio                   | Cat No. mPEG-SVA-5000-1G          |
| Poly-L-lysine                                                                      | Sigma Aldrich                | Cat No. P7890                     |
| Glucose Oxidase from <i>Aspergillus niger</i> type VII                             | Sigma Aldrich                | Cat No. G2133-50KU                |
| Catalase from bovine liver                                                         | Sigma Aldrich                | Cat No. C40-100MG                 |
| (±)-6-Hydroxy-2,5,7,8-tetramethylchromane-2-carboxylic acid (Trolox)               | Sigma Aldrich                | Cat No. 238813-1G                 |
| TransFluoSpheres® Streptavidin-Labeled Microspheres (488/645), 0.04μm, 0.5% solids | Life Technologies/Invitrogen | Cat No. T-10711                   |
| Yeast tRNA (10 mg/mL)                                                              | ThermoFisher Scientific      | Cat No. AM7119                    |
| Streptavidin, 10mg                                                                 | Prozyme                      | Cat No. SA10-10mg                 |
| Heparin sodium salt from porcine intestinal mucosa                                 | Sigma Aldrich                | H4784-250MG                       |
| <b>Commercial Materials and Kits</b>                                               |                              |                                   |
| Ultra-clear centrifuge tubes (14mL capacity)                                       | Beckman Coulter              | Cat. No. 344060                   |
| Criterion TGX Precast Gel (4-20%)                                                  | Bio-Rad                      | Cat No. 567-1093                  |
| Precision Plus Protein™ All Blue Prestained Protein Standards                      | Bio-Rad                      | Cat No. 161-0373                  |
| Silver Stain Plus™ Kit                                                             | Bio-Rad                      | Cat No. 161-0449                  |
| GE Healthcare IgG Sepharose 6 Fast Flow resin                                      | VWR Scientific               | Cat No. 95017-050                 |
| 0.8x4cm Poly-Prep Chromatography Columns                                           | Bio-Rad                      | Cat No. 731-1550                  |
| Calmodulin Affinity Resin                                                          | Agilent                      | Cat No. 214303                    |



|                                                                                                                                                       |                                                  |                                                                                                             |
|-------------------------------------------------------------------------------------------------------------------------------------------------------|--------------------------------------------------|-------------------------------------------------------------------------------------------------------------|
| 10kDa MWCO Slide-A-Lyzer dialysis cassette                                                                                                            | ThermoFisher Scientific                          | Cat No. 66380                                                                                               |
| Amicon Ultra 100kDa MWCO centrifugal filters                                                                                                          | Sigma Aldrich                                    | Cat No. Z677906-24                                                                                          |
| Gold Seal Cover Slips (#1, 24x60mm)                                                                                                                   | Fisher Scientific                                | Cat No. 5031132                                                                                             |
| Gold Seal Cover Slips (#1, 25x25mm)                                                                                                                   | ThermoFisher Scientific                          | Cat No. 3307                                                                                                |
| Fisherbrand Five-Slide Mailer                                                                                                                         | Fisher Scientific                                | Cat No. HS15986                                                                                             |
| <b>Experimental Models: Organisms/Strains</b>                                                                                                         |                                                  |                                                                                                             |
| BJ2168 <i>S. cerevisiae</i> (MATa prc1–407 prb1–1122 pep4–3 leu2 trp1 ura3–52 gal2)                                                                   | Bruce Goode Lab (Crawford et al., 2008)          | yAAH0001                                                                                                    |
| U1-SNAP-TAP <i>S. cerevisiae</i> (BJ2168 + SNP1::SNP1-fSNAP-Hyg + SNU71::SNU71-TAP-URA)                                                               | This study                                       | yAAH0393                                                                                                    |
| <b>Oligonucleotides</b>                                                                                                                               |                                                  |                                                                                                             |
| U1 cOligo (DNA): 5' - CTT AAG GTA AGT AT                                                                                                              | Integrated DNA Technologies                      | JL-U1 5' complement                                                                                         |
| U1 RT Oligo (DNA): 5' - TCA GTA GGA CTT CTT GAT                                                                                                       | Integrated DNA Technologies                      | SRH15                                                                                                       |
| U1 snRNA mimic (UU, RNA): 5' - AUA CUU ACC UUA AGA UAU CAG AGG AGA UCA AGA AG /3Cy5Sp/                                                                | Integrated DNA Technologies                      | SRH21                                                                                                       |
| U1 snRNA mimic (ΨΨ, RNA): 5' - AUA CΨΨ ACC UUA AGA UAU CAG AGG AGA UCA AGA AG /3Cy5Sp/                                                                | Integrated DNA Technologies                      | SRH36                                                                                                       |
| Handle for U1 mimic (DNA): 5' - /Biotin/ TCT CTT CTT GAT CTC CTC TGA TAT CTT A                                                                        | Integrated DNA Technologies                      | SRH22                                                                                                       |
| <i>RNA-Cy3 oligomers are listed separately in Figure 1-Supplemental Table 1. All oligonucleotides were purchased from Integrated DNA Technologies</i> |                                                  |                                                                                                             |
| <b>Recombinant DNA</b>                                                                                                                                |                                                  |                                                                                                             |
| Plasmid for <i>in vitro</i> transcription of RP51A (pBS117)                                                                                           | Michael Rosbash Lab (Seraphin and Rosbash, 1991) | pAAH0016                                                                                                    |
| <b>Equipment and Instruments</b>                                                                                                                      |                                                  |                                                                                                             |
| Typhoon FLA 9000                                                                                                                                      | GE Healthcare Life Sciences                      | <a href="https://www.gelifesciences.com">https://www.gelifesciences.com</a>                                 |
| ImageQuant LAS 4000                                                                                                                                   | GE Healthcare Life Sciences                      | <a href="https://www.gelifesciences.com">https://www.gelifesciences.com</a>                                 |
| Retsch Mixer Mill MM 400                                                                                                                              | Retsch                                           | <a href="https://www.retsch.com/">https://www.retsch.com/</a>                                               |
| <b>Software and Algorithms</b>                                                                                                                        |                                                  |                                                                                                             |
| ImageQuant TL 8.1 software                                                                                                                            | GE Healthcare Life Sciences                      | <a href="https://www.gelifesciences.com">https://www.gelifesciences.com</a>                                 |
| MATLAB                                                                                                                                                | MathWorks                                        | <a href="https://www.mathworks.com/products/matlab.html">https://www.mathworks.com/products/matlab.html</a> |
| ChemDraw Prime 15.0                                                                                                                                   | PerkinElmer                                      | <a href="http://www.cambridge-soft.com/">http://www.cambridge-soft.com/</a>                                 |

531

## 532 TAP Tagging of Yeast U1 snRNP

533 C-terminal TAP and fSNAP tags were appended to the endogenous SNU71 and SNP1  
 534 proteins, respectively, by homologous recombination in the protease-deficient *S. cerevisiae*

535 strain BJ2168 and selection for growth in the absence of uracil (TAP) or in the presence of  
536 hygromycin (fSNAP) (Larson and Hoskins, 2017; Puig et al., 2001).

### 537 **Purification of labeled U1 snRNP**

538 A total of 10 L U1-SNAP-TAP yeast cultures were grown in 1 L batches of rich media  
539 (YPD) in a shaking incubator (30°C, 220 rpm) to late log stage. The cells were pelleted, washed,  
540 and resuspended in 3.5 mL (per 1 L culture) Lysis Buffer (10 mM Tris-Cl pH 8.0, 300 mM NaCl,  
541 10 mM KCl, 0.2 mM EDTA, 5 mM imidazole, 10% v/v glycerol, 0.1% v/v NP40, 1 mM PMSF, 0.5  
542 mM DTT). The resuspended cells were flash frozen in a drop-wise fashion in liquid nitrogen and  
543 stored at -80°C until lysed. The frozen pellets were lysed in batches using a Retsch Mixer Mill  
544 MM 400 (five rounds of 3 min at 10 Hz, with 2 min cooling in liquid nitrogen between rounds).  
545 The frozen lysate powder was stored at -80°C.

546 The total cell lysate from 10 L was thawed at 4°C. Lysis Buffer (10 mL) was used to  
547 dissolve one EDTA-free Protease Inhibitor Tablet (Pierce), and this solution was combined with  
548 the cell lysate. Insoluble material was removed by centrifugation (15,000 rpm, 4°C, 30 min).  
549 The supernatant was then cleared in an ultracentrifuge at 36,000 rpm, 4°C, for 75 min. The  
550 resulting middle layer was carefully removed and added to 300 µL GE Healthcare IgG  
551 Sepharose 6 Fast Flow resin that had been equilibrated with IgG150 Buffer (10 mM Tris-Cl pH  
552 8.0, 150 mM NaCl, 10 mM KCl, 1 mM MgCl<sub>2</sub>, 5 mM imidazole, 0.1% v/v NP40, no reducing  
553 agent) to incubate at 4°C with rotation for 2 hr.

554 The resin slurry was divided between two 0.8x4cm Poly-Prep Chromatography Columns.  
555 After the lysate had flowed through and without the resin running dry, each column was washed  
556 with 3x10mL IgG150 Buffer (plus 1 mM DTT) containing one dissolved Protease Inhibitor Tablet  
557 (Pierce) per 50 mL buffer. The flow was stopped by capping the columns with 1.0 mL of resin  
558 plus solution remaining. TEV protease (40U) and the SNAP-tag dye (2 µM) were then added.  
559 The columns were sealed with caps, and the resin was incubated for 45 min at room temperature

560 in the dark with mixing. Subsequent steps were carried out with as little exposure to light as  
561 possible.

562 The labeled, TEV-cleaved eluent was added directly to calmodulin affinity resin (400  $\mu$ L)  
563 that had been equilibrated with Calmodulin Binding Buffer (10 mM Tris-Cl pH 8.0, 150 mM NaCl,  
564 10 mM KCl, 1 mM  $MgCl_2$ , 5 mM imidazole, 2 mM  $CaCl_2$ , 0.1% v/v NP40, no reducing agent,  
565 4°C). The IgG resin was washed with an additional 200-300  $\mu$ L IgG150 Buffer (plus 1 mM DTT)  
566 to ensure all sample was transferred to the calmodulin resin. To this slurry, three equivalent  
567 volumes (with respect to the volume of the TEV eluate) of Calmodulin Binding Buffer containing  
568 10mM  $\beta$ -mercaptoethanol were added. The slurry was then incubated at 4°C with rotation for  
569 60 min.

570 The resin slurry was divided between two 0.8x4cm Poly-Prep Chromatography Columns.  
571 After the flow through was eluted, each column was washed with 3x5mL Calmodulin Binding  
572 Buffer containing 10 mM  $\beta$ -mercaptoethanol. Before elution, the columns were capped at the  
573 bottom to control the timing of subsequent steps. Buffer exchange was performed by washing  
574 the resin with 100  $\mu$ L (approximate resin bed volume) Calmodulin Elution Buffer (CEB, 10 mM  
575 Tris-Cl pH 8.0, 150 mM NaCl, 10 mM KCl, 1 mM  $MgCl_2$ , 5 mM imidazole, 4 mM EGTA, 0.08%  
576 v/v NP40, 10 mM  $\beta$ -mercaptoethanol). Immediately afterwards, labeled U1 snRNP was eluted  
577 in 4x150  $\mu$ L fractions using incubation times of 0, 2.5, 5, and 10 min with the elution buffer.

578 Fractions were then analyzed by SDS-PAGE, and fractions E1-E3 typically had the  
579 highest concentrations of U1. These fractions were pooled and dialyzed in a 10kDa MWCO  
580 Slide-A-Lyzer dialysis cassette in 1 L Dialysis Buffer (10 mM Tris-Cl pH 8.0, 150 mM NaCl, 10  
581 mM KCl, 1 mM  $MgCl_2$ , 5 mM imidazole, 10 mM  $\beta$ -mercaptoethanol) overnight at 4°C. In the  
582 morning, the cassette was moved to fresh Dialysis Buffer (1 L) for 4 h. The dialyzed sample was  
583 concentrated in an Amicon Ultra 100kDa MWCO centrifugal filter unit (14,000 rpm, 4°C, in 1 min  
584 intervals). The sample was mixed by pipetting up and down between spins and by addition of

585 more dialyzed sample. The final sample volume (~100  $\mu$ L) was divided into 5  $\mu$ L aliquots, flash  
586 frozen, and stored at -80°C.

### 587 **HPLC-ESI-MS/MS Analysis**

588 Samples were analyzed by HPLC-ESI-MS/MS using a system consisting of a high-  
589 performance liquid chromatograph (nanoAcquity, Waters) connected to an electrospray  
590 ionization (ESI) Orbitrap mass spectrometer (LTQ Velos, ThermoFisher Scientific). HPLC  
591 separation employed a 100 x 365 mm fused silica capillary micro-column packed with 20 cm of  
592 1.7 $\mu$ m-diameter, 130 Angstrom pore size, C18 beads (Waters BEH), with an emitter tip pulled  
593 to approximately 1  $\mu$ m using a laser puller (Sutter Instruments). Peptides were loaded on-  
594 column at a flow-rate of 400nL/min for 30 minutes and then eluted over 120 min at a flow-rate of  
595 300 nl/minute with a gradient of 2-30% acetonitrile in 0.1% formic acid. Full-mass profile scans  
596 were performed in the orbitrap between 300-1500 m/z at a resolution of 60,000, followed by ten  
597 MS/MS HCD scans of the ten highest intensity parent ions at 42% relative collision energy and  
598 7,500 resolution, with a mass range starting at 100 m/z. Dynamic exclusion was enabled with a  
599 repeat count of two over the duration of 30 seconds and an exclusion window of 120 seconds.

### 300 **Activity Assays**

301 Splicing extracts (yWCE) were prepared from a BJ2168-derived strain of *S. cerevisiae* as  
302 previously described (Ansari and Schwer, 1995). Aliquots were flash frozen in liquid nitrogen,  
303 stored at -80°C, and thawed on ice once before use. Capped, [<sup>32</sup>P]-labeled RP51A pre-mRNA  
304 was prepared by *in vitro* transcription and gel purified and splicing conditions were adapted from  
305 previously described protocols (Crawford et al., 2008). Splicing reactions contained 100 mM  
306 potassium phosphate pH 7.3, 3% w/v PEG-8000, 2.5 mM MgCl<sub>2</sub>, 1 mM DTT, 2 mM ATP, 0.4  
307 U/ $\mu$ L RNasin, 40% v/v yWCE, 0.2nM [<sup>32</sup>P]-labeled RP51A pre-mRNA, and 0.048 U/ $\mu$ L RNaseH.  
308 To ablate the U1 snRNA, these reactions were first prepared without ATP, RNasin, [<sup>32</sup>P]-labeled  
309 RP51A, or U1 snRNP and with the inclusion of 0.016  $\mu$ g/ $\mu$ L U1 cOligo (5'-CTTAAGGTAAGTAT-  
Hansen, et al.

310 3') so that RNaseH would digest the 5' end of endogenous U1 snRNA in the yWCE (Du and  
311 Rosbash, 2001; Larson and Hoskins, 2017). After 30 min at 30°C, the remaining components of  
312 the splicing reaction were added along with 0.04 µg/µL purified U1 snRNP. As controls,  
313 reactions were prepared without purified U1 snRNP or without U1 cOligo in the ablation reaction.  
314 After 60 min at room temperature the reactions were stopped, and RNA was extracted as  
315 previously described (Crawford et al., 2008). The products were resolved on a 9% acrylamide  
316 (19:1) gel (8M urea, 1X TBE buffer). The gel was dried and imaged using a Phosphor Screen  
317 and a Typhoon FLA 9000. The bands were quantified using ImageQuant software.

### 318 **5' End Analysis by Dideoxynucleotide Sequencing**

319 RNA from purified U1 snRNP or 40 µL U1-SNAP-TAP yWCE was isolated by phenol-  
320 chloroform extraction and ethanol precipitation. All of the RNA isolated from labeled, purified U1  
321 snRNP was used for reverse transcription while only 10% of the isolated RNA from yWCE was  
322 necessary. The isolated RNA was combined with 1 pmol [<sup>32</sup>P]-labeled primer complementary to  
323 nucleotides 27-44 of U1 snRNA (5'- TCAGTAGGACTTCTTGAT) in Annealing Buffer (250mM  
324 KCl, 10mM Tris pH8.0) and the reaction was incubated at 90°C for 3 min, snap cooled on ice for  
325 3 min, then pre-heated to 45°C for 5 min. A reverse transcriptase (2xRT) master mix was  
326 prepared containing 1 U/µL AMV Reverse Transcriptase in 25mM Tris pH 8.0, 8µM DTT, and  
327 0.4mM dNTPs.

328 For dideoxynucleotide sequencing, five parallel reactions were set up for each sample.  
329 The reactions were made with 3.0 µL 2xRT master mix, 1.0 µL ddNTP/H<sub>2</sub>O (1mM ddATP, 1mM  
330 ddCTP, 1mM ddTTP, 0.3mM ddGTP, or RNase-free water), and 2.0µL annealing reaction. The  
331 reverse transcription reaction was incubated at 45°C for 45min. To stop the reaction, 2 µL  
332 formamide loading dye (95% v/v deionized formamide, 0.025% w/v bromophenol blue, 0.025%  
333 w/v xylene cyanol FF, 5 mM EDTA pH 8.0) was added then the samples were cooled on ice for  
334 3 min then heated to 90°C for 3 min. A portion (5 µL) of each reaction was loaded onto a 0.4

335 mM thick 20% acrylamide (19:1) / 7.5M urea / 1xTBE gel. The gel was run until bromophenol  
336 blue neared the bottom. The gel was dried and imaged using a phosphorscreen and a Typhoon  
337 FLA 9000.

### 338 **RNA Oligo Secondary Structure Prediction and Calculation of Free Energy of Unwinding**

339 mFold was used to identify potential stable secondary structures formed by the RNA  
340 oligos (Zuker, 2003).

341 The approximate stability of the duplex between U1 snRNA or the U1 mimic RNAs and  
342 the Cy3-RNA oligomers was predicted by calculating the stability of hybridization of the uridine-  
343 substituted SSRS to the complementary sequence of the RNA oligo using the Hybridization  
344 function of DINAMelt (Markham and Zuker, 2005). We note that while base pairs with  
345 pseudouridine are predicted to be more stable than those to uridine [(Deb et al., 2019); also see  
346 **Fig. 4**], thermodynamic parameters for base pairing to consecutive pseudouridine bases, such  
347 as those found within the U1 SSRS (5'-AUACΨΨACCU-3'), have not to our knowledge been  
348 determined. Therefore, we were unable to use nearest-neighbor methods to calculate the  
349 thermodynamic stabilities for RNAs pairing to the U1 SSRS and instead approximated these  
350 stabilities using a uridine-substituted SSRS.

### 351 **Microscope Slide Preparation**

352 Microscope slides and coverslips were cleaned and assembled into flow as previously  
353 described (Crawford et al., 2008). Briefly, top and bottom coverslips were cleaned by sonication  
354 for 60 min at 40°C in successive washes of 2% v/v Micro-90 solution, absolute ethanol, 1 M KOH  
355 and water with intermittent rinsing with MilliQ water between each wash step. The cleaned  
356 coverslips were silanized using freshly prepared 1% v/v Vectabond in acetone (~30mL to cover)  
357 for 10 min at room temperature. After silanization, the slides were immediately and thoroughly  
358 rinsed with absolute ethanol. The coverslips were thoroughly dried again then assembled into  
359 flow cells using vacuum grease to demark lanes.

360 Poly-L-lysine-graft-PEG copolymer (PLL-g-PEG) passivation was used to coat the slide  
361 surface and heparin was included in slide washing and imaging buffers to produce a negatively-  
362 charged surface (Salomon et al., 2015). Dry aliquots (2 mg) of PLL-g-PEG were dissolved to a  
363 final concentration of 4 mg/mL PLL-g-PEG in 100mM HEPES-KOH pH7.4 just before use. The  
364 silanized lanes of the flow cell were filled with the PLL-g-PEG solution (~30  $\mu$ L each) and  
365 incubated at room temperature overnight in the dark. For experiments using the U1 snRNA oligo  
366 mimic, slides were coated with PEG as previously described (Crawford et al., 2008).

### 367 **U1 snRNA Mimic Preparation**

368 The U1 snRNA mimic, the biotinylated DNA handle, and an RNA oligomer, were annealed  
369 and the tripartite complex was immobilized on the slide surface. Annealing reactions consisted  
370 of 2  $\mu$ M Cy5-labeled U1 mimic (UU or  $\Psi\Psi$ ), 200 nM biotinylated DNA handle, and 10  $\mu$ M Cy3-  
371 labeled RNA oligomer in 50mM Tris-HCl pH 7.4, 400mM NaCl. The reactions were heated to  
372 95°C in a thermocycler and cooled by decreasing temperature in 5°C intervals every 2 min until  
373 the reaction reached 25°C. After heating, reactions were immediately stored on until use in  
374 single-molecule experiments.

### 375 **Single-molecule Microscopy**

376 CoSMoS experiments were performed on a custom-built, objective-based micromirror  
377 total internal reflection fluorescence microscope (Larson et al., 2014). The red laser (633nm)  
378 was set to 250 $\mu$ W, and the green laser (532nm) was set to 400 $\mu$ W for data collection. The  
379 fluorescence signal was imaged at 1 sec exposure at 5 sec intervals unless otherwise specified.  
380 For all experiments, the imaging buffer included glucose, glucose oxidase, and catalase, as  
381 oxygen scavengers (OSS), and trolox as a triplet state quencher (TSQ) (Crawford et al., 2008).  
382 Drift correction was performed, as necessary, by tracking the movement of individual  
383 immobilized spots for the duration of the experiment. Auto-focusing was carried out using a  
384 785nm laser and was done every minute in between exposures. Mapping files were generated

385 each day using TransFluorSpheres (Thermo Fisher) fluorescent in both the <635nm and  
386 >635nm fields of view (FOV).

387 For experiments with the U1 snRNA mimic, prepared slides were first washed with 200  
388  $\mu$ L Annealing Buffer (50mM Tris-HCl pH7.4, 400mM NaCl) with 0.01 mg/mL yeast tRNA. Prior  
389 to imaging, each lane was washed with 70  $\mu$ L 0.2 mg/mL streptavidin in Annealing Buffer  
390 (+tRNA) which was immediately washed away with 70  $\mu$ L Annealing Buffer (+tRNA). The  
391 annealed mimic/handle/oligomer complex was diluted by a factor of 1:2,000-5,000 in Annealing  
392 Buffer (+OSS +TSQ +tRNA) and the lane was washed with 70  $\mu$ L of this solution. The  
393 accumulation of the complex on the slide surface was monitored in real time in the >635nm FOV  
394 and when the desired density of spots was achieved, excess components were washed away  
395 using 70 $\mu$ L Annealing Buffer (+OSS +TSQ +tRNA). To initiate movies, the buffer in the lane  
396 was exchanged with 90  $\mu$ L Mock Splicing Buffer (100mM potassium phosphate pH 7.3, 10mM  
397 HEPES-KOH pH 7.9, 20 mM KCl, 2.5 mM MgCl<sub>2</sub>, 8% v/v glycerol, 5% w/v PEG-8000, 1.4 mM  
398 DTT, +OSS +TSQ +tRNA) and data recording was immediately started. For less stable  
399 complexes (e.g., RNA-7a), 30 min of data collection was sufficient to observe the dissociation of  
700 most (>90%) RNA oligomers. For the most stable complexes (e.g.,  $\Psi\Psi$  mimic + RNA-10), 80  
701 min of data collection was necessary and imaging intervals were reduced to 1 exposure/10s.

702 For experiments with U1 snRNP, prepared slides were first washed with 200  $\mu$ L Mock  
703 Splicing Buffer with 0.05 mg/mL heparin and 0.01 mg/mL yeast tRNA. Subsequent steps were  
704 performed one lane at a time. The lane was washed with 70  $\mu$ L 0.2-0.4 mg/mL streptavidin in  
705 Mock Splicing Buffer (+heparin +tRNA) which was allowed to incubate with the slide surface for  
706 2-5 min. The lane was then washed with 70  $\mu$ L 0.5 mg/mL (10x) heparin in Mock Splicing Buffer  
707 (+tRNA) and incubated for 10 min before U1 snRNP was added. U1 snRNP was diluted to a  
708 final concentration of 5-20nM in Mock Splicing Buffer (+heparin +tRNA +OSS +TSQ) and added  
709 to the lane. The accumulation of fluorescent spots was monitored periodically in the >635nm



710 FOV until an optimal density was achieved (usually 2-5 min), then the excess complexes were  
711 washed away with 70  $\mu$ L Mock Splicing Buffer (+heparin +tRNA +OSS +TSQ). Finally, the lane  
712 was washed with 70 $\mu$ L 10nM RNA-Cy3 in Mock Splicing Buffer (+heparin +tRNA +OSS +TSQ)  
713 and data recording was immediately started. In U1 snRNP experiments, the Cy3 signal was  
714 typically imaged at 1 sec exposure at 5 sec intervals for 360 frames (30 min). We determined  
715 that the lifetimes measured in these experiments were not being limited by photobleaching by  
716 performing control experiments where the power of the 532nm laser was varied from 200 to 600  
717  $\mu$ W or where the periodicity of the 1 sec exposure was increased to 10 sec.

### 718 **Data Analysis**

719 Data analysis was performed as previously described (Hoskins et al., 2011;  
720 Shcherbakova et al., 2013). In brief, the fluorescence signal detected in the >635 FOV was used  
721 to select areas of interest (AOIs). After drift correction, these locations were mapped to the <635  
722 FOV and the pixel intensity was integrated for each AOI using custom MATLAB software. Each  
723 colocalization event was manually inspected to confirm the presence of a colocalized spot in the  
724 AOI.

725 For fitting dwell times of oligos binding to the U1 mimic, the distributions were analyzed  
726 using survival fraction plots and fit with single exponential decay functions which generated a  
727 95% confidence interval (CI) for the calculated  $k_{\text{off}}$  and an R-square parameter for the fit. The  
728 reciprocal of  $k_{\text{off}}$  is the mean lifetime ( $\mu$ ).

729 For analysis of oligo binding to immobilized U1 snRNPs, the distribution of observed dwell  
730 times was used to construct a probability density plot in which the dwell times were binned and  
731 the probability of each bin was divided by the product of the bin width and the total number of  
732 events in the data set. Error bars for each bin were calculated as previously described based  
733 on the error of binomial distributions (Hoskins et al., 2011). These plots were fit using a  
734 maximum likelihood function for a single- or double-exponential distribution as described by  
Hansen, et al.

735 **Equations 1 and 2**, respectively (Hoskins et al., 2011). In these equations,  $t_m$  is the time  
736 between consecutive frames and  $t_{max}$  is the duration of the experiment;  $A_1$  and  $A_2$  are the fitted  
737 amplitudes for a bi-exponential distribution; and the “taus” are the fitted dwell time parameters  
738 for single- ( $\tau_0$ ) or bi-exponential ( $\tau_1$  and  $\tau_2$ ) distributions. Errors in the fit were determined by  
739 bootstrapping 1000 random samples of the data and determining the standard deviation of the  
740 resulting normal distribution.

$$\left[ \left( A_0 \cdot \left( e^{-\frac{t_m}{\tau_0}} - e^{-\frac{t_{max}}{\tau_0}} \right) \right) \right]^{-1} \cdot \left[ \frac{A_0}{\tau_0} \cdot e^{-\frac{t}{\tau_0}} \right] \quad (1)$$

$$\left[ \left( A_1 \cdot \left( e^{-\frac{t_m}{\tau_1}} - e^{-\frac{t_{max}}{\tau_1}} \right) \right) + \left( A_2 \cdot \left( e^{-\frac{t_m}{\tau_1}} - e^{-\frac{t_{max}}{\tau_1}} \right) \right) \right]^{-1} \cdot \left[ \frac{A_1}{\tau_1} \cdot e^{-\frac{t}{\tau_1}} + \frac{A_2}{\tau_2} \cdot e^{-\frac{t}{\tau_2}} \right] \quad (2)$$

where  $A_1 + A_2 = 1$

741  
742 To judge the goodness of the fits, the log likelihood ratio test was used to determine if the  
743 simplest kinetic model was sufficient to describe the data (Kaur et al., 2019).

744

745

746

747 **Figures and Figure Legends**

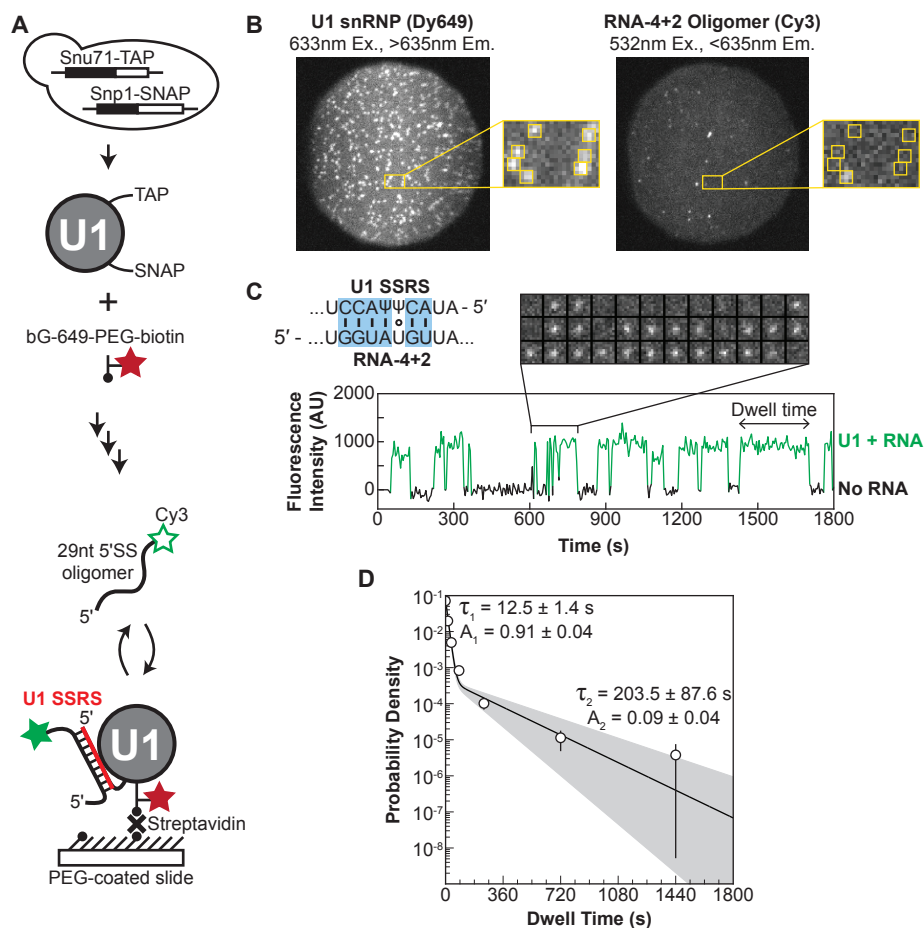

748

749 **Figure 1. Immobilized Yeast U1 snRNP forms Reversible Short- and Long-Lived**  
 750 **Interactions with a 5' SS Oligo.** (A) Preparation of purified, fluorescently-labeled yeast U1  
 751 snRNP using SNAP- and TAP-tags. In single-molecule experiments U1 snRNP is immobilized  
 752 to the slide surface and its interactions with Cy3-labeled RNA oligomers are observed using  
 753 CoSMoS. The U1 SSRS that binds to the oligo is shown in red. (B) Images showing individual  
 754 U1 snRNP molecules tethered to the slide surface (left field of view, FOV) and colocalized Cy3-  
 755 labeled RNA-4+2 molecules (right FOV). (C) Representative fluorescence trajectory of changes  
 756 in Cy3 intensity (green) due to oligo binding to a single immobilized U1 molecule. RNA binding  
 757 events appear as spots of fluorescence in the recorded images (see inset). Also shown is the  
 758 predicted pairing interactions (blue) between the RNA-4+2 oligo and the U1 SSRS. (D)  
 759 Probability density histogram of dwell times for the RNA-4+2 oligo and the fitted parameters of  
 760 the data to an equation containing two exponential terms; the shaded region represents the  
 761 uncertainty associated with the parameters.

762

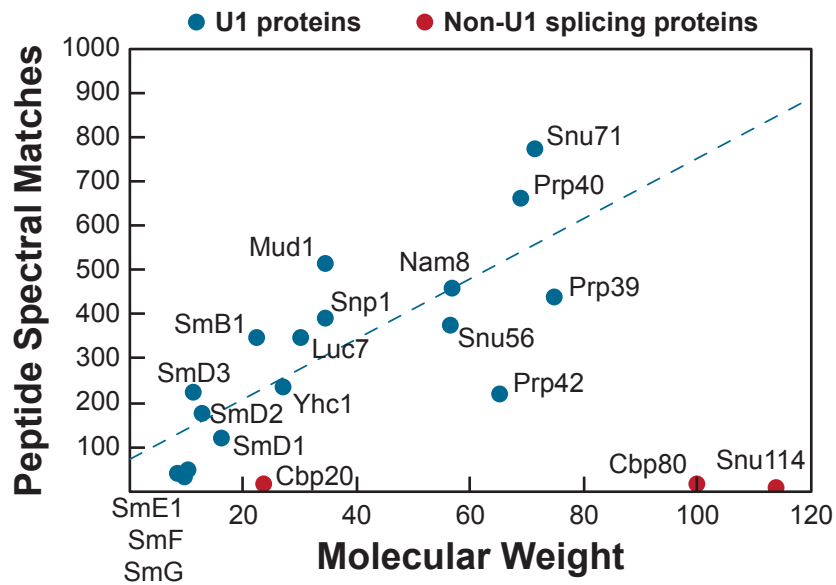

763  
764  
765  
766  
767  
768  
769  
770  
771  
772  
773

**Figure 1-Supplement 1. Mass Spectrometry Analysis of Purified U1 Samples.** Plotted are the number of peptide spectral matches observed for the indicated U1 snRNP proteins (blue) vs. the predicted molecular weight of the protein in kDa. The indicated U1 proteins were observed in all preparations of U1 analyzed by mass spectrometry. In some preparations, peptides corresponding to Cbp20 (2 out of 3 preparations), Cbp80 (1 out of 3 preparations), and Snu114 (1 out of 3 preparations) were also observed (red). These were the only known non-U1 splicing factors observed in the samples and these factors were likely present at very low levels since few peptides were observed given the molecular weights of the proteins.

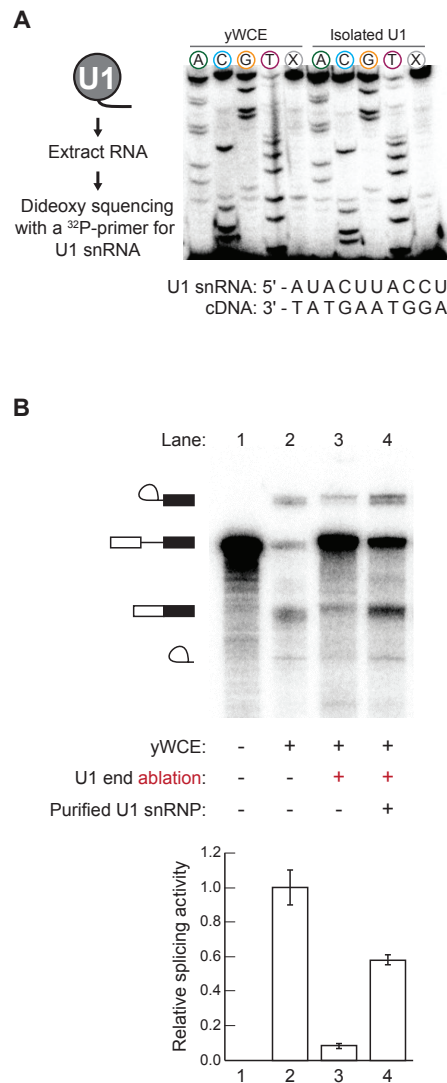

774  
775  
776  
777  
778  
779  
780  
781  
782  
783  
784  
785  
786  
787

**Figure 1-Supplement 2. Dideoxy Sequencing of the Purified U1 snRNA and Activity Assay.** (A) The presence of the U1 SSRS in the purified U1 snRNP was confirmed by dideoxy sequencing of the SSRS and comparison with sequencing of the snRNA present in total RNA isolated from yeast whole cell extract (yWCE). The dideoxynucleotide present in each reaction is noted above the corresponding lane. Lanes marked X did not contain any dideoxynucleotides. Similar patterns are obtained for the U1 snRNA present in the yWCE as in the isolated U1 and confirm presence of the SSRS. (B) Purified U1 can restore splicing activity of yWCE in which the endogenous U1 was ablated by addition of a complementary DNA oligo and RNase H cleavage. Relative splicing efficiencies shown were calculated as the amounts of mRNA products formed compared to the total of the observed RNA species. The bar graph represents the average of 3 replicate experiments  $\pm$ SD.

788 **Figure 1-Supplemental Table 1**

| Name             | Sequence <sup>a</sup>                                                   | $\Delta G^{\circ}_{unw}$ <sup>b</sup><br>(kcal/mol) |
|------------------|-------------------------------------------------------------------------|-----------------------------------------------------|
| RNA-10           | 5' - ACU GAA AA <b>A GGU AAG UAU</b> AUA UGG ACU GA - <b>Cy3</b>        | 12.5                                                |
| RNA-9a           | 5' - ACU GAA AA <b>A GGU AAG UAA</b> AUA UGG ACU GA - <b>Cy3</b>        | 12.0                                                |
| RNA-9b           | 5' - ACU GAA AAU <b>GGU AAG UAU</b> AUA UGG ACU GA - <b>Cy3</b>         | 12.4                                                |
| RNA-8a           | 5' - ACU GAA AA <b>A GGU AAG UUA</b> AUA UGG ACU GA - <b>Cy3</b>        | 9.3                                                 |
| RNA-8b           | 5' - ACU GAA AAU <b>GGU AAG UAA</b> AUA UGG ACU GA - <b>Cy3</b>         | 11.8                                                |
| RNA-7a           | 5' - ACU GAA AAU <b>GGU AAG UUA</b> AUA UGG ACU GA - <b>Cy3</b>         | 9.1                                                 |
| RNA-7b           | 5' - ACU GAA AAU C <b>GU AAG UAA</b> AUA UGG ACU GA - <b>Cy3</b>        | 6.7                                                 |
| RNA-6a           | 5' - ACU GAA AAU <b>GGU AAG</b> AUA AUA UGG ACU GA - <b>Cy3</b>         | 8.7                                                 |
| RNA-6b           | 5' - ACU GAA AAU C <b>GU AAG UUA</b> AUA UGG ACU GA - <b>Cy3</b>        | 3.9                                                 |
| RNA-5            | 5' - ACU GAA AAU <b>GGU AAC</b> AUA AUA UGG ACU GA - <b>Cy3</b>         | 2.7                                                 |
| RNA-4            | 5' - ACU GAA AAU <b>GGU AUC</b> AUA AUA UGG ACU GA - <b>Cy3</b>         | 3.2                                                 |
| RNA-C            | 5' - ACU GAA AAU CCA UUC AUA AUA UGG ACU GA - <b>Cy3</b>                | ND                                                  |
|                  |                                                                         |                                                     |
| RNA-1+5          | 5' - ACU GAA AAU <b>G<u>c</u>U AAG UUA</b> AUA UGG ACU GA - <b>Cy3</b>  | 0.4                                                 |
| RNA-2+4          | 5' - ACU GAA AAU <b>GG<u>a</u>AAG UUA</b> AUA UGG ACU GA - <b>Cy3</b>   | 3.3                                                 |
| RNA-3+3          | 5' - ACU GAA AAU <b>GGU <u>u</u>AG UUA</b> AUA UGG ACU GA - <b>Cy3</b>  | 4.0                                                 |
| RNA-4+2          | 5' - ACU GAA AAU <b>GGU <u>Au</u>G UUA</b> AUA UGG ACU GA - <b>Cy3</b>  | 4.7                                                 |
| RNA-5+1          | 5' - ACU GAA AAU <b>GGU <u>AAc</u> UUA</b> AUA UGG ACU GA - <b>Cy3</b>  | 2.7                                                 |
|                  |                                                                         |                                                     |
| RNA-2+7<br>A(+1) | 5' - ACU GAA AA <b>A G<u>a</u>U AAG UAU</b> AUA UGG ACU GA - <b>Cy3</b> | 4.4                                                 |
| RNA-2+7<br>C(+1) | 5' - ACU GAA AA <b>A G<u>c</u>U AAG UAU</b> AUA UGG ACU GA - <b>Cy3</b> | 4.4                                                 |
| RNA-2+7<br>U(+1) | 5' - ACU GAA AA <b>A G<u>u</u>U AAG UAU</b> AUA UGG ACU GA - <b>Cy3</b> | 4.7                                                 |

789 <sup>a</sup> The regions of predicted complementarity to the U1 SSRS are in bold and highlighted. The  
790 G(+1) position of the 5' SS (based on RP51A) is underlined.

791 <sup>b</sup> The predicted standard free energy change for duplex unwinding from U1 using DINAMelt at  
792 37°C in 1 M NaCl. Note that these free energies were calculated using a uridine-substituted  
793 SSRS, see **Methods**.

794

795

796

797  
798  
799

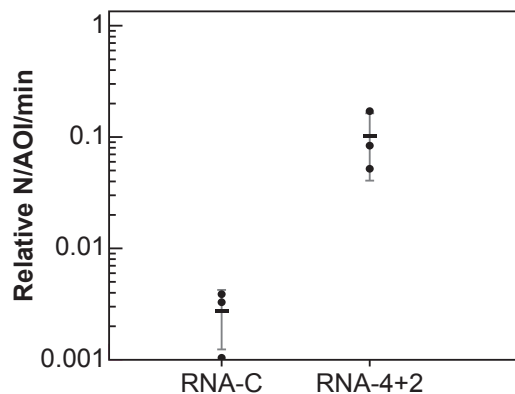

300  
301  
302  
303  
304  
305  
306  
307

**Figure 1-Supplement 3. Observed U1 Binding Events are Sequence-Dependent.** Relative event densities of oligo binding to immobilized U1 molecules for RNA-C (little to no pairing with the SSRS) and RNA-4+2 (the WT RP51A 5' SS with 6 predicted base pairs). Plotted are the results from 3 replicate experiments (dots) along with the average  $\pm$ SD (horizontal bars and vertical lines).

308

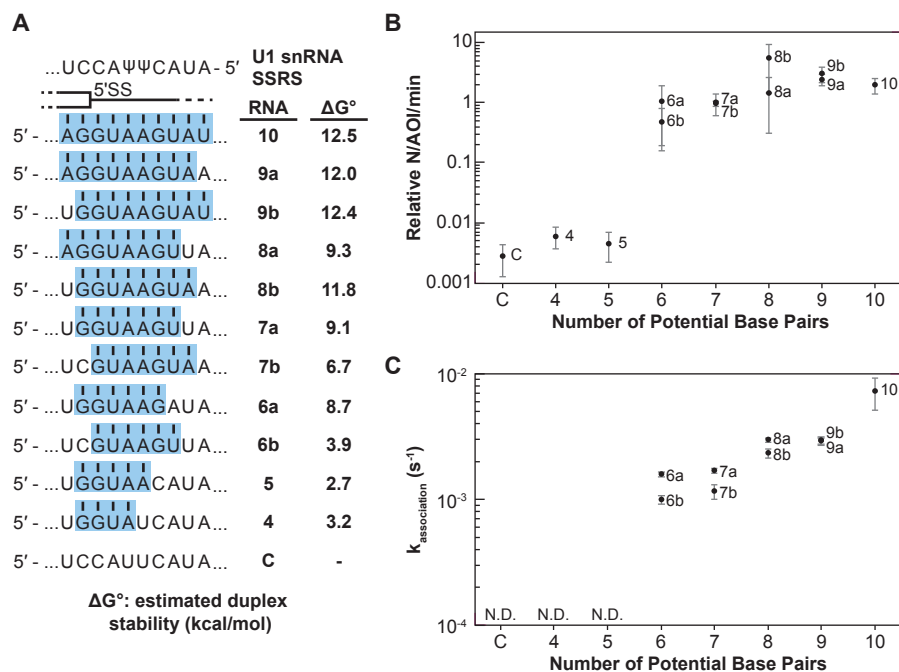

309

310 **Figure 2. Impact of Base Pairing Potential on RNA Oligo Binding to U1.** (A) RNA oligos  
 311 tested for interaction with U1 containing 4-10 predicted base pairs and the calculated free energy  
 312 changes for duplex unwinding/formation based on nearest neighbor analysis. The regions  
 313 shaded in blue are predicted to pair with the SSRS (B) Relative event densities of oligo binding  
 314 to immobilized U1 molecules as a function of potential base pairs. (C) Measured association  
 315 rates of the oligos to U1 as a function of potential base pairs. For (B), the plotted points represent  
 316 the average results from at least 3 replicate experiments  $\pm$ SD. For (C), the plotted points  
 317 represent the fitted parameters  $\pm$  the uncertainties of the fits.

318

319



320 **Figure 2-Supplemental Table 1**

| <b>RNA</b>          | <b><i>N</i><sup>a</sup></b> | <b><i>k</i><sub>association</sub><sup>b</sup></b> |
|---------------------|-----------------------------|---------------------------------------------------|
| RNA-10              | 91                          | 7.18 ± 2.04                                       |
| RNA-9a              | 95                          | 2.90 ± 0.16                                       |
| RNA-9b              | 124                         | 2.93 ± 0.23                                       |
| RNA-8a              | 153                         | 2.96 ± 0.12                                       |
| RNA-8b              | 77                          | 2.32 ± 0.19                                       |
| RNA-7a              | 87                          | 1.68 ± 0.07                                       |
| RNA-6a <sup>c</sup> | 44                          | 1.57 ± 0.07                                       |
| RNA-6b <sup>c</sup> | 41                          | 0.99 ± 0.07                                       |
| RNA-4+2             | 85                          | 2.95 ± 0.16                                       |

*( x 10<sup>-3</sup> sec<sup>-1</sup> )*

321 <sup>a</sup> *N* represents the number of measured time intervals

322 <sup>b</sup> *k*<sub>association</sub> determined for experiments where [RNA] = 10 nM

323

324

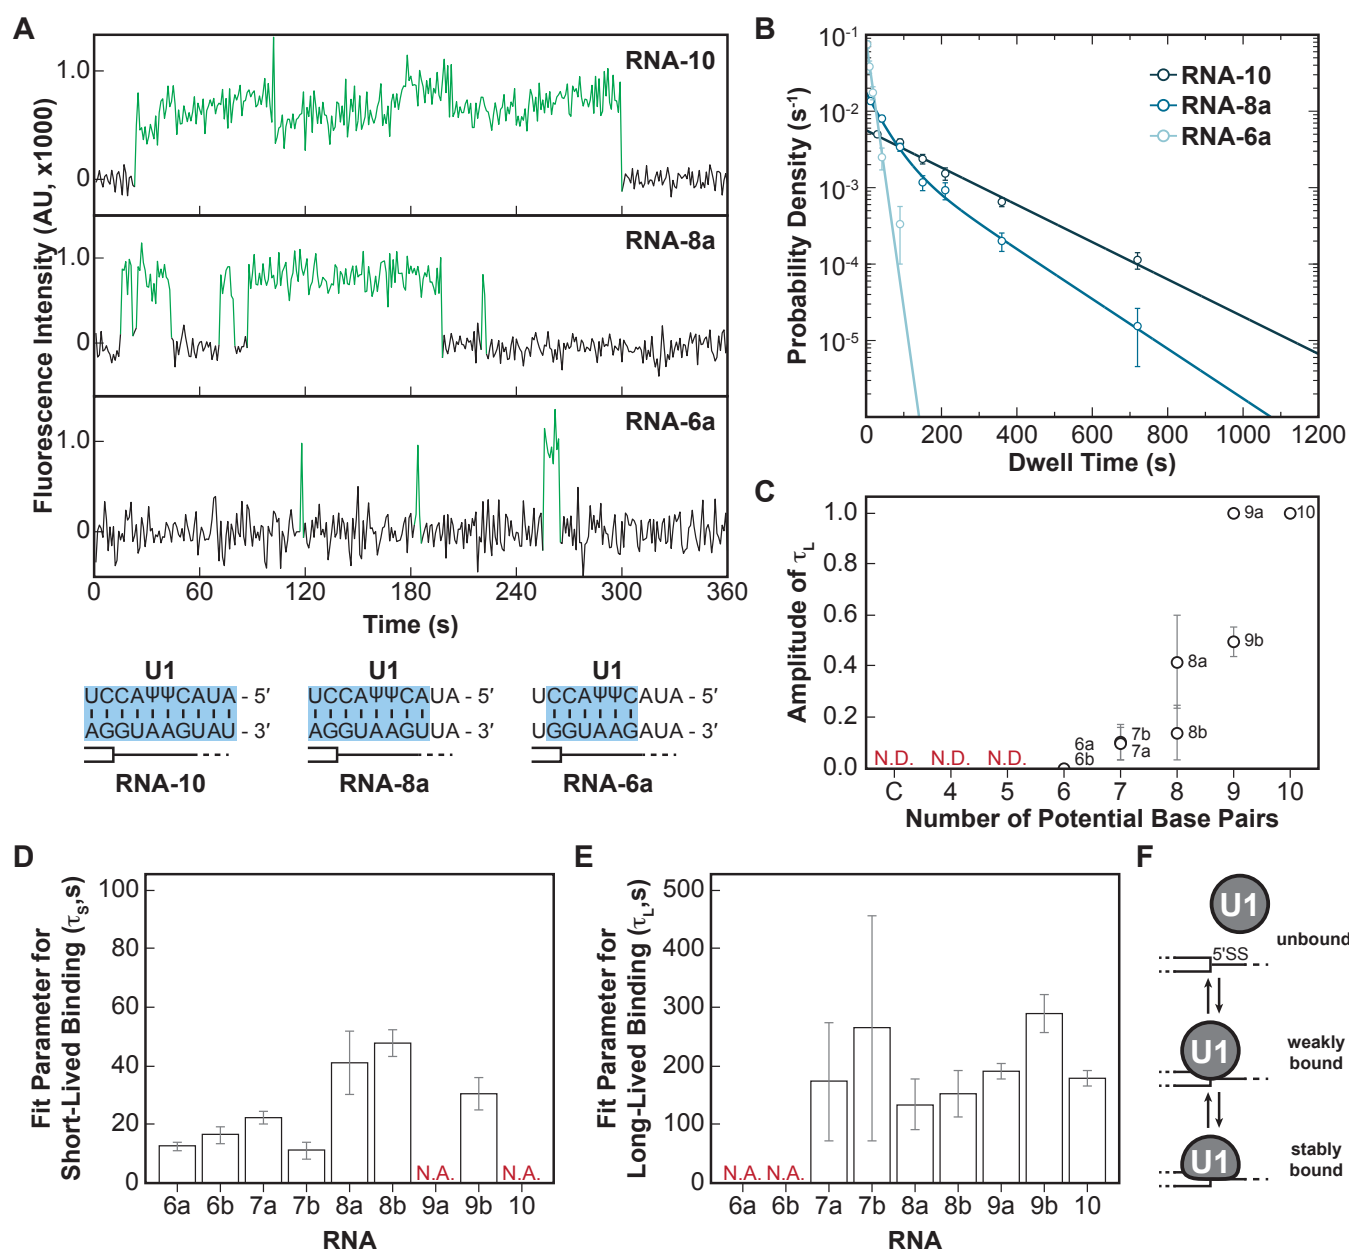

325

326 **Figure 3. The long-lived state is dependent on the length of the snRNA-RNA duplex.** (A)  
 327 Representative fluorescence trajectories of changes in Cy3 intensity (green) due to oligo binding to a single immobilized U1 molecules for RNAs 6a, 8a, and 10. Also shown are the predicted  
 328 pairing interactions (blue) between the oligos and the U1 SSRS. (B) Probability density  
 329 histograms for dwell times for RNAs 6a, 8a, and 10 binding to U1. Lines represent the single- or  
 330 double-exponential distribution obtained for the fitted parameter from each data set. (C) The  
 331 amplitude of the long-lived population ( $\tau_L > 60$  s) is shown for each RNA oligomer in **Fig. 2A**.  
 332 The amplitude is not determined (N.D.) for oligomers for which little binding was observed. (D-  
 333 E) The fit parameters for short-lived binding (panel D,  $\tau_s < 60$  s) and long-lived binding (panel E,  
 334  $\tau_L > 60$  s) shown for each RNA oligomer in **Fig. 2A**. If there is only one fit parameter, then the  
 335 other is not applicable (N.A.). (F) A two-step mechanism for U1/RNA association that can  
 336 account for both short and long-lived binding events.

338

339 **Figure 3-Supplemental Table 1**

| <b>RNA</b>    | <b>N<sup>a</sup></b> | <b>Tau</b>           | <b>Tau1 (<math>\tau_s</math>)</b> | <b>Tau2 (<math>\tau_L</math>)</b> | <b>Amp. of Tau2</b> |
|---------------|----------------------|----------------------|-----------------------------------|-----------------------------------|---------------------|
| <b>RNA-10</b> | 295                  | 178.1 $\pm$ 13.3 sec |                                   |                                   |                     |
| <b>RNA-9a</b> | 232                  | 190.1 $\pm$ 13.8 sec |                                   |                                   |                     |
| <b>RNA-9b</b> | 273                  |                      | 30.4 $\pm$ 5.7 sec                | 287.7 $\pm$ 32.7 sec              | 0.50 $\pm$ 0.06     |
| <b>RNA-8a</b> | 270                  |                      | 40.9 $\pm$ 10.8 sec               | 133.3 $\pm$ 43.8 sec              | 0.42 $\pm$ 0.18     |
| <b>RNA-8b</b> | 351                  |                      | 47.7 $\pm$ 4.6 sec                | 151.2 $\pm$ 39.7 sec              | 0.14 $\pm$ 0.11     |
| <b>RNA-7a</b> | 132                  |                      | 22.2 $\pm$ 2.4 sec                | 172.8 $\pm$ 100.9 sec             | 0.10 $\pm$ 0.07     |
| <b>RNA-7b</b> | 67                   |                      | 10.3 $\pm$ 2.8 sec                | 236.0 $\pm$ 158.2 sec             | 0.13 $\pm$ 0.07     |
| <b>RNA-6a</b> | 100                  | 12.4 $\pm$ 1.4 sec   |                                   |                                   |                     |
| <b>RNA-6b</b> | 59                   | 16.2 $\pm$ 2.8 sec   |                                   |                                   |                     |

340 <sup>a</sup> Number of dwell times combined from the replicates and fit to obtain the corresponding  
341 parameters.

342

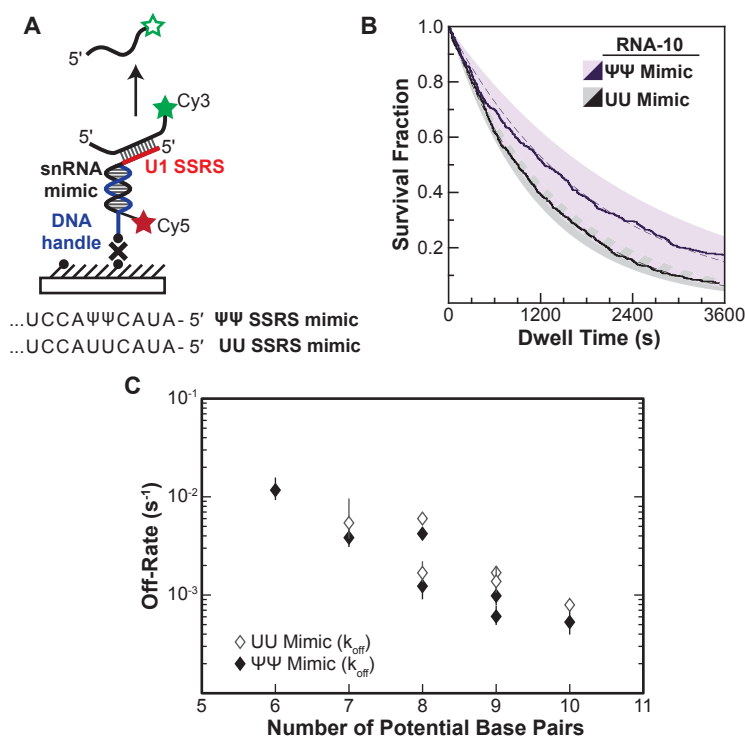

343

344 **Figure 4. Lifetimes of 5' SS Oligo/RNA Interactions are Dependent on Base-Pairing**  
 345 **Potential in a RNA-Only Mimic of the U1 SSRS.** (A). Schematic of a single molecule assay  
 346 for monitoring dissociation of RNA oligos from the RNA-only mimic of the U1 SSRS. Two mimics  
 347 were used that contain pseudouridine ( $\Psi$ ) or uridine (U) at two positions in the SSRS that have  
 348  $\Psi$  in the native U1 snRNA. (B) The fraction of colocalized RNA oligos remaining was plotted  
 349 over time to yield survival fraction curves for determining RNA oligo off-rates (black lines). The  
 350 curves were then fit to exponential decay functions to yield off-rates as well as 95% confidence  
 351 intervals for the fits (dashed lines and shaded regions, respectively). Shown are the survival  
 352 fraction curves for RNA-10 dissociation (see **Fig. 2A**). (C) Measured off-rates for RNA Oligos to  
 353 the SSRS mimics (see **Figure 4-Supplemental Table 1**) plotted as a function of potential base  
 354 pairs.

355

356

357 **Figure 4—Supplemental Table 1**

| <b>Mimic</b>    | <b>RNA</b> | <b>N<sup>a</sup></b> | <b>k<sub>off</sub> (95% CI)<sup>b</sup></b>                    |
|-----------------|------------|----------------------|----------------------------------------------------------------|
| <i>UU mimic</i> | RNA-10     | 580                  | <b>7.71</b> (7.69 7.73) x 10 <sup>-4</sup> sec <sup>-1</sup>   |
| <i>UU mimic</i> | RNA-9a     | 235                  | <b>1.40</b> (1.37 1.43) x 10 <sup>-3</sup> sec <sup>-1</sup>   |
| <i>UU mimic</i> | RNA-9b     | 409                  | <b>1.67</b> (1.64 1.70) x 10 <sup>-3</sup> sec <sup>-1</sup>   |
| <i>UU mimic</i> | RNA-8a     | 170                  | <b>1.65</b> (1.62 1.67) x 10 <sup>-3</sup> sec <sup>-1</sup>   |
| <i>UU mimic</i> | RNA-8b     | 126                  | <b>5.83</b> (5.71 5.95) x 10 <sup>-3</sup> sec <sup>-1</sup>   |
| <i>UU mimic</i> | RNA-7a     | 48                   | <b>5.23</b> (4.86 5.66) x 10 <sup>-3</sup> sec <sup>-1</sup>   |
| <b>ΨΨ mimic</b> | RNA-10     | 550                  | <b>5.50</b> (5.46 5.54) x 10 <sup>-4</sup> sec <sup>-1</sup>   |
| <b>ΨΨ mimic</b> | RNA-9a     | 287                  | <b>10.10</b> (9.97 10.20) x 10 <sup>-4</sup> sec <sup>-1</sup> |
| <b>ΨΨ mimic</b> | RNA-9b     | 276                  | <b>6.06</b> (5.97 6.14) x 10 <sup>-4</sup> sec <sup>-1</sup>   |
| <b>ΨΨ mimic</b> | RNA-8a     | 172                  | <b>1.33</b> (1.29 1.36) x 10 <sup>-3</sup> sec <sup>-1</sup>   |
| <b>ΨΨ mimic</b> | RNA-8b     | 212                  | <b>4.15</b> (4.10 4.21) x 10 <sup>-3</sup> sec <sup>-1</sup>   |
| <b>ΨΨ mimic</b> | RNA-7a     | 157                  | <b>3.73</b> (3.57 3.88) x 10 <sup>-3</sup> sec <sup>-1</sup>   |
| <b>ΨΨ mimic</b> | RNA-6a     | 67                   | <b>1.28</b> (1.17 1.39) x 10 <sup>-2</sup> sec <sup>-1</sup>   |

358 <sup>a</sup> Number of (dwell times) combined from multiple replicates.

359 <sup>b</sup> The calculated k<sub>off</sub> (and 95% confidence interval for this value) that results from fitting the  
360 combined dwell times.

361

362

363

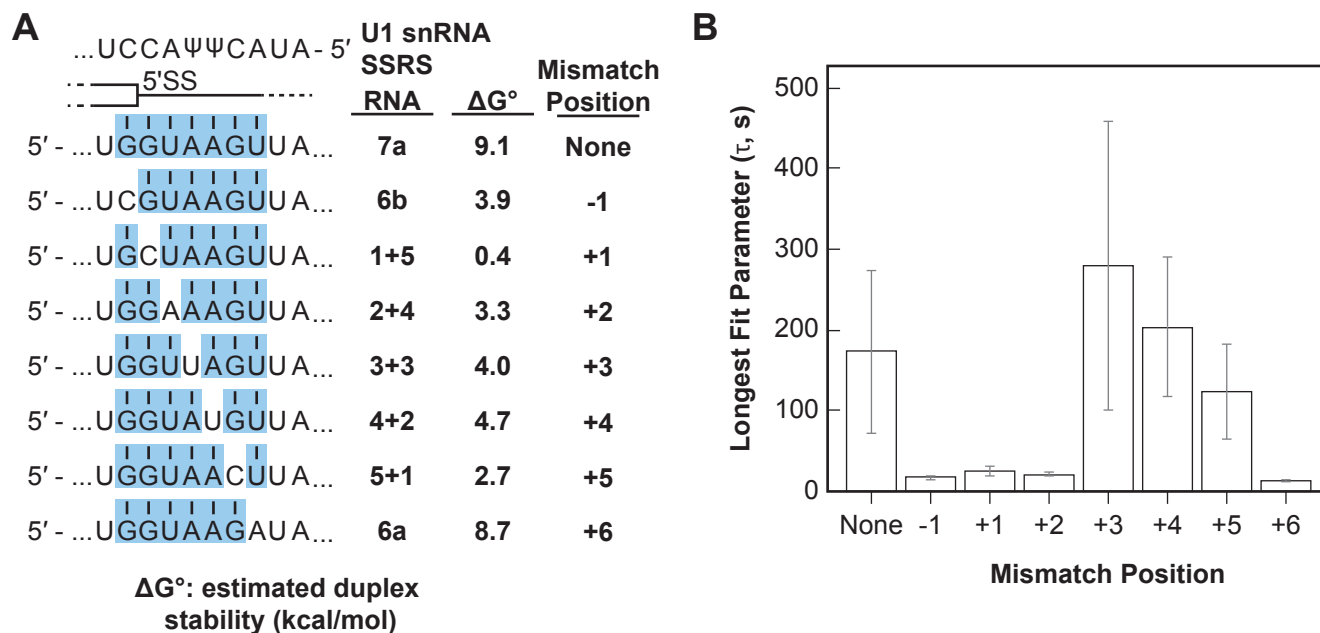

364

365 **Figure 5. Long-lived U1/RNA Interactions are Dependent on Mismatch Position.** (A) RNA  
 366 oligos tested for interaction with U1 containing mismatches at the -1 to +6 positions and the  
 367 calculated free energy changes for duplex unwinding/formation based on nearest neighbor  
 368 analysis. The regions shaded in blue are predicted to pair with the SSRS. (B) The value of the  
 369 longest-lived parameter ( $\tau_0$  or  $\tau_2$ , **Figure 5-Supplemental Table 1**) obtained by fits of the  
 370 distributions of dwell times to U1 for each RNA oligomer in panel (A). The plotted bars represent  
 371 the fitted parameters  $\pm$  the uncertainties of the fits. Note that data for RNA oligos 7a, 6a, and 6b  
 372 were replotted from Fig. 3D, E for comparison.

373

374

375 **Figure 5-Supplemental Table 1**

| <b>RNA<br/>(Mismatch<br/>Position)</b> | <b>N<sup>a</sup></b> | <b>Tau (<math>\tau_0</math>)</b> | <b>Tau1 (<math>\tau_1</math>)</b> | <b>Tau2 (<math>\tau_2</math>)</b> | <b>A<sub>2</sub></b> |
|----------------------------------------|----------------------|----------------------------------|-----------------------------------|-----------------------------------|----------------------|
| <b>RNA-7a<br/>(None)</b>               | 132                  |                                  | 22.2 ± 2.4 sec                    | 172.8 ± 100.9 sec                 | 0.10 ± 0.07          |
| <b>RNA-6a<br/>(+6)</b>                 | 100                  | 12.4 ± 1.4 sec                   |                                   |                                   |                      |
| <b>RNA-6b<br/>(-1)</b>                 | 59                   | 16.2 ± 2.8 sec                   |                                   |                                   |                      |
| <b>RNA-1+5<br/>(+1)</b>                | 68                   | 23.8 ± 6.3 sec                   |                                   |                                   |                      |
| <b>RNA-2+4<br/>(+2)</b>                | 45                   | 20.3 ± 3.1 sec                   |                                   |                                   |                      |
| <b>RNA-3+3<br/>(+3)</b>                | 59                   |                                  | 11.4 ± 1.9 sec                    | 279.2 ± 178.6 sec                 | 0.21 ± 0.07          |
| <b>RNA-4+2<br/>(+4)</b>                | 367                  |                                  | 12.5 ± 1.4 sec                    | 203.5 ± 87.6 sec                  | 0.09 ± 0.04          |
| <b>RNA-5+1<br/>(+5)</b>                | 113                  |                                  | 12.6 ± 3.3 sec                    | 122.8 ± 59.8 sec                  | 0.14 ± 0.06          |

376 <sup>a</sup> Number of dwell times combined from the replicates and fit to obtain the corresponding  
377 parameters.

378  
379

380

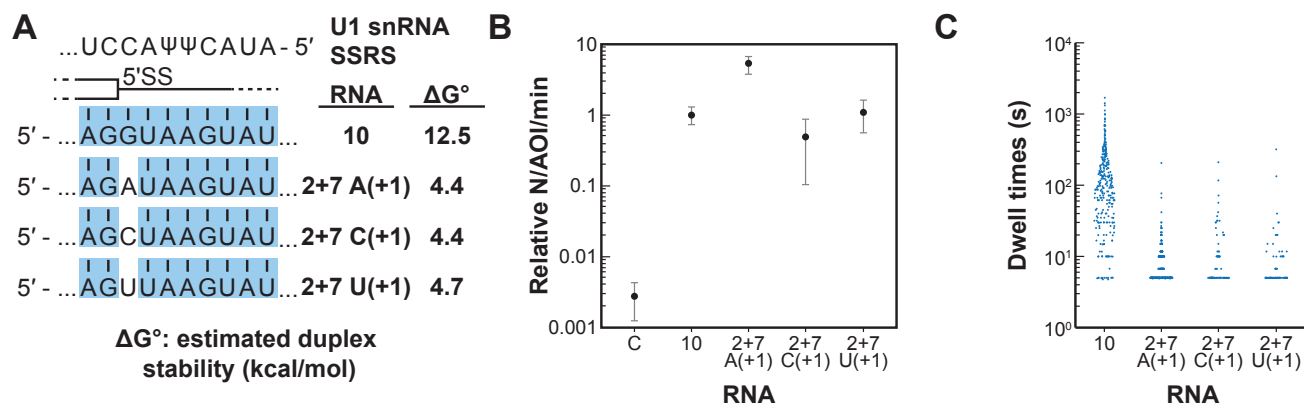

381

382 **Figure 6. Long-lived Interactions are Greatly Stimulated by G at the 5' SS +1 Position.** (A)  
 383 RNA oligos tested for interaction with U1 containing mismatches only at the +1 positions and the  
 384 calculated free energy changes for duplex unwinding/formation based on nearest neighbor  
 385 analysis. The regions shaded in blue are predicted to pair with the SSRS. (B) Relative event  
 386 densities of oligo binding to immobilized U1 molecules for RNAs shown in panel (A). Plotted are  
 387 averages from replicate experiments  $\pm$ SD (dots and vertical lines). (C) Distribution of observed  
 388 dwell times for U1 interactions with oligos from panel (A). Each dot corresponds to a single dwell  
 389 time.

390

391

392



393 **Figure 6-Supplemental Table 1**

| RNA             | Tau ( $\tau$ ) <sup>a</sup> | Log-likelihood (1 exponential term) <sup>b</sup> | Tau1 ( $\tau_S$ ) <sup>c</sup> | Tau2 ( $\tau_L$ ) <sup>c</sup> | A <sub>1</sub> <sup>c</sup> | A <sub>2</sub> <sup>c</sup> | Log-likelihood (2 exponential terms) <sup>d</sup> |
|-----------------|-----------------------------|--------------------------------------------------|--------------------------------|--------------------------------|-----------------------------|-----------------------------|---------------------------------------------------|
| RNA-2+7 - A(+1) | 7.5 ± 0.5                   | -1563.0                                          | 6.9 ± 0.2                      | 92.0 ± 42.4                    | 0.99 ± 0.01                 | 0.01                        | -1543.3                                           |
| RNA-2+7 - C(+1) | 13.8 ± 2.8                  | -322.3                                           | 8.6 ± 1.1                      | 72.2 ± 33.2                    | 0.90 ± 0.07                 | 0.10                        | -308.9                                            |
| RNA-2+7 - U(+1) | 12.1 ± 3.7                  | -1563.0                                          | 7.1 ± 0.6                      | 188.1 ± 68.1                   | 0.97 ± 0.02                 | 0.03                        | -284.3                                            |

394  
395 <sup>a</sup> Fit parameter to an equation containing a single exponential term.

396 <sup>b</sup> Log-likelihood output for the fit to an equation with a single exponential term.

397 <sup>c</sup> Fit parameters to an equation containing two exponential terms. A<sub>1</sub> is the amplitude of the  
398 first exponential term,  $\tau_S$ . A<sub>2</sub> is the amplitude of the second exponential term,  $\tau_L$ .

399 <sup>d</sup> Log-likelihood output for the fit to an equation with two exponential terms. The more positive  
300 log-likelihood indicates these data are better fit to equations containing two terms.

301

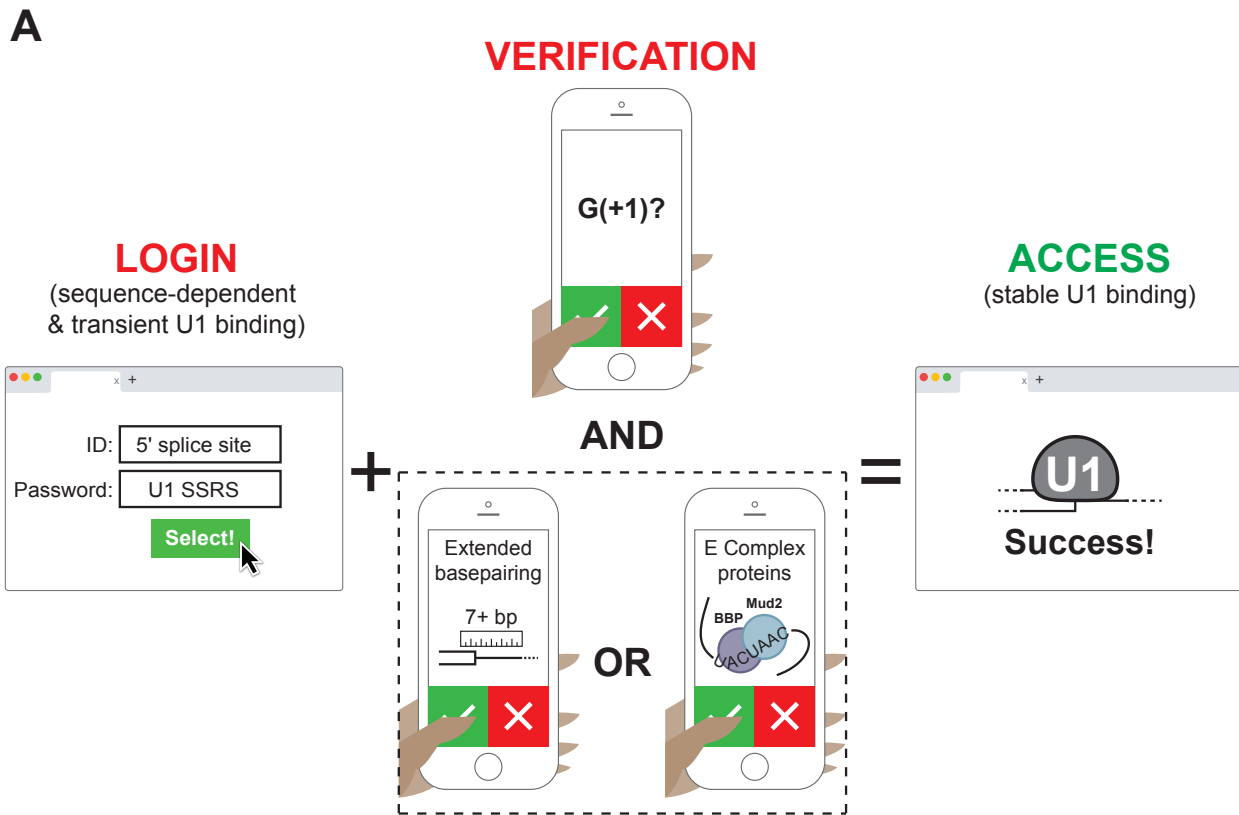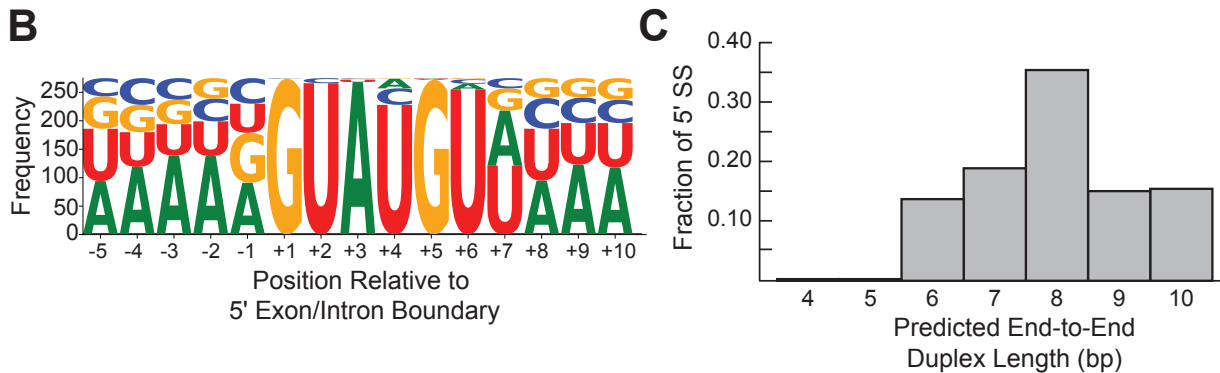

302

303

304 **Figure 7. Multi-Factor Authentication Model for 5' SS Recognition.** (A) U1 binding initially  
 305 occurs by formation of a weakly interacting complex that is dependent on base pairing potential  
 306 between the RNA and U1 SSRS. Stable binding is dependent on presence of G+1 at the 5' SS  
 307 and formation of an extended duplex with an end-to-end length of at least 7 bp or the presence  
 308 of *trans*-acting splicing factors such as E complex proteins (Larson and Hoskins, 2017). (B)  
 309 Sequence LOGO for annotated yeast 5' SS (Lim and Burge, 2001). (C) Histogram of end-to-end  
 310 duplex lengths based on base pairing potential between annotated yeast 5' SS and the U1  
 311 SSRS. Most of these duplexes contain one or more mismatches with the SSRS.

312

313

314

915 **REFERENCES**

- 916
- 917 Agarwal R, Schwer B, Shuman S. 2016. Structure–function analysis and genetic interactions of  
918 the Luc7 subunit of the *Saccharomyces cerevisiae* U1 snRNP. *RNA* 22:1302–1310.  
919 doi:10.1261/rna.056911.116
- 920 Ansari A, Schwer B. 1995. SLU7 and a novel activity, SSF1, act during the PRP16-dependent  
921 step of yeast pre-mRNA splicing. *The EMBO journal* 14:4001–4009.
- 922 Bai R, Wan R, Yan C, Lei J, Shi Y. 2018. Structures of the fully assembled *Saccharomyces*  
923 *cerevisiae* spliceosome before activation. *Science (New York, NY)* 360:1423–1429.  
924 doi:10.1126/science.aau0325
- 925 Braun JE, Friedman LJ, Gelles J, Moore MJ. 2018. Synergistic assembly of human pre-  
926 spliceosomes across introns and exons. *eLife* 7:20221. doi:10.7554/elife.37751
- 927 Brow DA. 2002. Allosteric cascade of spliceosome activation. *Annual review of genetics*  
928 36:333–360. doi:10.1146/annurev.genet.36.043002.091635
- 929 Carmel I, Tal S, Vig I, Ast G. 2004. Comparative analysis detects dependencies among the 5'  
930 splice-site positions. *Rna* 10:828–840. doi:10.1261/rna.5196404
- 931 Chen JY, Stands L, Staley JP, Jackups RR, Latus LJ, Chang TH. 2001. Specific alterations of  
932 U1-C protein or U1 small nuclear RNA can eliminate the requirement of Prp28p, an  
933 essential DEAD box splicing factor. *Molecular Cell* 7:227–232.
- 934 Chiou N-T, Shankarling G, Lynch KW. 2013. HnRNP L and HnRNP A1 Induce Extended U1  
935 snRNA Interactions with an Exon to Repress Spliceosome Assembly. *Molecular Cell*.  
936 doi:10.1016/j.molcel.2012.12.025
- 937 Cisse II, Kim H, Ha T. 2012. A rule of seven in Watson-Crick base-pairing of mismatched  
938 sequences. *Nature Structural & Molecular Biology*. doi:10.1038/nsmb.2294
- 939 Craig ME, Crothers DM, Doty P. 1971. Relaxation kinetics of dimer formation by self  
940 complementary oligonucleotides. *J Mol Biol* 62:383–401. doi:10.1016/0022-2836(71)90434-  
941 7
- 942 Crawford DJ, Hoskins AA, Friedman LJ, Gelles J, Moore MJ. 2008. Visualizing the splicing of  
943 single pre-mRNA molecules in whole cell extract. *RNA (New York, NY)* 14:170–179.  
944 doi:10.1261/rna.794808
- 945 Deb I, Popena Ł, Sarzyńska J, Małgowska M, Lahiri A, Gdaniec Z, Kierzek R. 2019.  
946 Computational and NMR studies of RNA duplexes with an internal pseudouridine-adenosine  
947 base pair. *Sci Rep-uk* 9:16278. doi:10.1038/s41598-019-52637-0
- 948 Du H, Rosbash M. 2001. Yeast U1 snRNP-pre-mRNA complex formation without U1snRNA-  
949 pre-mRNA base pairing. *RNA (New York, NY)* 7:133–142.

- 950 Du H, Tardiff DF, Moore MJ, Rosbash M. 2004. Effects of the U1C L13 mutation and  
951 temperature regulation of yeast commitment complex formation. *Proceedings of the*  
952 *National Academy of Sciences of the United States of America* 101:14841–14846.  
953 doi:10.1073/pnas.0406319101
- 954 Feltz C van der, Krummel DP. 2016. Purification of Native Complexes for Structural Study  
955 Using a Tandem Affinity Tag Method. *Journal of visualized experiments : JoVE* e54389.  
956 doi:10.3791/54389
- 957 Fortes P, Bilbao-Cortés D, Fornerod M, Rigaut G, Raymond W, Séraphin B, Mattaj IW. 1999.  
958 Luc7p, a novel yeast U1 snRNP protein with a role in 5' splice site recognition. *Gene Dev*  
959 13:2425–2438. doi:10.1101/gad.13.18.2425
- 960 Fouser LA, Friesen JD. 1986. Mutations in a yeast intron demonstrate the importance of  
961 specific conserved nucleotides for the two stages of nuclear mRNA splicing. *Cell* 45:81–93.
- 962 Globyte V, Lee SH, Bae T, Kim J, Joo C. 2019. CRISPR/Cas9 searches for a protospacer  
963 adjacent motif by lateral diffusion. *Embo J* 38. doi:10.15252/embj.201899466
- 964 Grate L, Ares M. 2002. Searching yeast intron data at ares lab web site. *Methods Enzymol*  
965 350:380–392. doi:10.1016/s0076-6879(02)50975-7
- 966 Hoskins AA, Friedman LJ, Gallagher SS, Crawford DJ, Anderson EG, Wombacher R, Ramirez  
967 N, Cornish VW, Gelles J, Moore MJ. 2011. Ordered and dynamic assembly of single  
968 spliceosomes. *Science (New York, NY)* 331:1289–1295. doi:10.1126/science.1198830
- 969 Jarmoskaite I, AlSadhan I, Vaidyanathan PP, Herschlag D. 2020. How to measure and  
970 evaluate binding affinities. *Elife* 9:e57264. doi:10.7554/elife.57264
- 971 Kaida D, Berg MG, Younis I, Kasim M, Singh LN, Wan L, Dreyfuss G. 2010. U1 snRNP  
972 protects pre-mRNAs from premature cleavage and polyadenylation. *Nature* 468:664–668.  
973 doi:10.1038/nature09479
- 974 Kaur H, Jamalidinan F, Condon SGF, Senes A, Hoskins AA. 2019. Analysis of spliceosome  
975 dynamics by maximum likelihood fitting of dwell time distributions. *Methods (San Diego,*  
976 *Calif)* 153:13–21. doi:10.1016/j.ymeth.2018.11.014
- 977 Konarska MM. 1998. Recognition of the 5' splice site by the spliceosome. *Acta Biochim Pol*  
978 45:869–881. doi:10.18388/abp.1998\_4346
- 979 Kondo Y, Oubridge C, Roon A-MM van, Nagai K. 2015. Crystal structure of human U1 snRNP,  
980 a small nuclear ribonucleoprotein particle, reveals the mechanism of 5' splice site  
981 recognition. *eLife* 4. doi:10.7554/elife.04986
- 982 Kotovic KM, Lockshon D, Boric L, Neugebauer KM. 2003. Cotranscriptional recruitment of the  
983 U1 snRNP to intron-containing genes in yeast. *Molecular and cellular biology* 23:5768–  
984 5779.

- 385 Krummel DAP, Oubridge C, Leung AKW, Li J, Nagai K. 2009. Crystal structure of human  
386 spliceosomal U1 snRNP at 5.5 Å resolution. *Nature* 458:475–480. doi:10.1038/nature07851
- 387 Kwon SC, Nguyen TA, Choi Y-G, Jo MH, Hohng S, Kim VN, Woo J-S. 2016. Structure of  
388 Human DROSHA. *Cell* 164:81–90. doi:10.1016/j.cell.2015.12.019
- 389 Lacadie SA, Rosbash M. 2005. Cotranscriptional spliceosome assembly dynamics and the role  
390 of U1 snRNA:5'ss base pairing in yeast. *Molecular Cell* 19:65–75.  
391 doi:10.1016/j.molcel.2005.05.006
- 392 Larson J, Kirk M, Drier EA, O'Brien W, MacKay JF, Friedman LJ, Hoskins AA. 2014. Design  
393 and construction of a multiwavelength, micromirror total internal reflectance fluorescence  
394 microscope. *Nature protocols* 9:2317–2328. doi:10.1038/nprot.2014.155
- 395 Larson JD, Hoskins AA. 2017. Dynamics and consequences of spliceosome E complex  
396 formation. *eLife* 6:e27592. doi:10.7554/elife.27592
- 397 Lerner MR, Boyle JA, Mount SM, Wolin SL, Steitz JA. 1980. Are snRNPs involved in splicing?  
398 *Nature* 283:220–224.
- 399 Li X, Liu S, Jiang J, Zhang L, Espinosa S, Hill RC, Hansen KC, Zhou ZH, Zhao R. 2017.  
400 CryoEM structure of *Saccharomyces cerevisiae* U1 snRNP offers insight into alternative  
401 splicing. *Nature communications* 8:1035. doi:10.1038/s41467-017-01241-9
- 402 Li X, Liu S, Zhang L, Issaian A, Hill RC, Espinosa S, Shi S, Cui Y, Kappel K, Das R, Hansen  
403 KC, Zhou ZH, Zhao R. 2019. A unified mechanism for intron and exon definition and back-  
404 splicing. *Nature* 573:375–380. doi:10.1038/s41586-019-1523-6
- 405 Lim LP, Burge CB. 2001. A computational analysis of sequence features involved in  
406 recognition of short introns. *Proceedings of the National Academy of Sciences of the United  
407 States of America* 98:11193–11198. doi:10.1073/pnas.201407298
- 408 MacRae IJ, Zhou K, Li F, Repic A, Brooks AN, Cande WZ, Adams PD, Doudna JA. 2006.  
409 Structural Basis for Double-Stranded RNA Processing by Dicer. *Science* 311:195–198.  
410 doi:10.1126/science.1121638
- 411 Malecka EM, Woodson SA. 2021. Stepwise sRNA targeting of structured bacterial mRNAs  
412 leads to abortive annealing. *Mol Cell* 81:1988-1999.e4. doi:10.1016/j.molcel.2021.02.019
- 413 Marimuthu K, Chakrabarti R. 2014. Sequence-dependent theory of oligonucleotide  
414 hybridization kinetics. *J Chem Phys* 140:175104. doi:10.1063/1.4873585
- 415 Markham NR, Zuker M. 2005. DINAMelt web server for nucleic acid melting prediction. *Nucleic  
416 Acids Res* 33:W577–W581. doi:10.1093/nar/gki591
- 417 McGrail JC, O'Keefe RT. 2008. The U1, U2 and U5 snRNAs crosslink to the 5' exon during  
418 yeast pre-mRNA splicing. *Nucleic Acids Research* 36:814–825. doi:10.1093/nar/gkm1098

- J19 Oh J-M, Di C, Venters CC, Guo J, Arai C, So BR, Pinto AM, Zhang Z, Wan L, Younis I,  
J20 Dreyfuss G. 2017. U1 snRNP telescripting regulates a size-function-stratified human  
J21 genome. *Nature Structural & Molecular Biology* 24:nsmb.3473-999. doi:10.1038/nsmb.3473
- J22 Parker R, Siliciano PG. 1993. Evidence for an essential non-Watson–Crick interaction between  
J23 the first and last nucleotides of a nuclear pre-mRNA intron. *Nature* 361:660–662.  
J24 doi:10.1038/361660a0
- J25 Plaschka C, Lin P-C, Charenton C, Nagai K. 2018. Prespliceosome structure provides insights  
J26 into spliceosome assembly and regulation. *Nature* 559:419–422. doi:10.1038/s41586-018-  
J27 0323-8
- J28 Plaschka C, Newman AJ, Nagai K. 2019. Structural Basis of Nuclear pre-mRNA Splicing:  
J29 Lessons from Yeast. *Cold Spring Harbor Perspectives in Biology* a032391.  
J30 doi:10.1101/cshperspect.a032391
- J31 Puig O, Caspary F, Rigaut G, Rutz B, Bouveret E, Bragado-Nilsson E, Wilm M, Séraphin B.  
J32 2001. The Tandem Affinity Purification (TAP) Method: A General Procedure of Protein  
J33 Complex Purification. *Methods (San Diego, Calif)* 24:218–229. doi:10.1006/meth.2001.1183
- J34 Puig O, Gottschalk A, Fabrizio P, Seraphin B. 1999. Interaction of the U1 snRNP with  
J35 nonconserved intronic sequences affects 5' splice site selection. *Gene Dev* 13:569–580.  
J36 doi:10.1101/gad.13.5.569
- J37 Rigaut G, Shevchenko A, Rutz B, Wilm M, Mann M, Séraphin B. 1999. A generic protein  
J38 purification method for protein complex characterization and proteome exploration. *Nature*  
J39 *Biotechnology* 17:1030–1032. doi:10.1038/13732
- J40 Roca X, Krainer AR. 2009. Recognition of atypical 5' splice sites by shifted base-pairing to U1  
J41 snRNA. *Nature Structural & Molecular Biology* 16:176–182. doi:10.1038/nsmb.1546
- J42 Roca X, Krainer AR, Eperon IC. 2013. Pick one, but be quick: 5' splice sites and the problems  
J43 of too many choices. *27:129–144*. doi:10.1101/gad.209759.112
- J44 Rosbash M, Séraphin B. 1991. Who's on first? The U1 snRNP-5 splice site interaction and  
J45 splicing. *Trends in Biochemical Sciences* 16:187–190. doi:10.1016/0968-0004(91)90073-5
- J46 Ruby SW, Abelson J. 1988. An early hierarchic role of U1 small nuclear ribonucleoprotein in  
J47 spliceosome assembly. *Science (New York, NY)* 242:1028–1035.
- J48 Rymond BC, Rosbash M. 1985. Cleavage of 5' splice site and lariat formation are independent  
J49 of 3' splice site in yeast mRNA splicing. *Nature* 317:735–737. doi:10.1038/317735a0
- J50 Salomon WE, Jolly SM, Moore MJ, Zamore PD, Serebrov V. 2015. Single-Molecule Imaging  
J51 Reveals that Argonaute Reshapes the Binding Properties of Its Nucleic Acid Guides. *Cell*  
J52 162:84–95. doi:10.1016/j.cell.2015.06.029

- J53 Schwer B, Shuman S. 2015. Structure-function analysis and genetic interactions of the Yhc1,  
J54 SmD3, SmB, and Snp1 subunits of yeast U1 snRNP and genetic interactions of SmD3 with  
J55 U2 snRNP subunit Lea1. *RNA (New York, NY)* 21:1173–1186. doi:10.1261/rna.050583.115
- J56 Schwer B, Shuman S. 2014. Structure-function analysis of the Yhc1 subunit of yeast U1  
J57 snRNP and genetic interactions of Yhc1 with Mud2, Nam8, Mud1, Tgs1, U1 snRNA, SmD3  
J58 and Prp28. *Nucleic Acids Research* 42:4697–4711. doi:10.1093/nar/gku097
- J59 Séraphin B, Rosbash M. 1991. The yeast branchpoint sequence is not required for the  
J60 formation of a stable U1 snRNA-pre-mRNA complex and is recognized in the absence of U2  
J61 snRNA. *The EMBO journal* 10:1209–1216.
- J62 Séraphin B, Rosbash M. 1989. Identification of functional U1 snRNA-pre-mRNA complexes  
J63 committed to spliceosome assembly and splicing. *Cell* 59:349–358.
- J64 Shcherbakova I, Hoskins AA, Friedman LJ, Serebrov V, Corrêa IR, Xu M-Q, Gelles J, Moore  
J65 MJ. 2013. Alternative Spliceosome Assembly Pathways Revealed by Single-Molecule  
J66 Fluorescence Microscopy. *Cell Reports* 5:151–165. doi:10.1016/j.celrep.2013.08.026
- J67 Shenasa H, Movassat M, Forouzmand E, Hertel KJ. 2020. Allosteric regulation of U1 snRNP  
J68 by splicing regulatory proteins controls spliceosomal assembly. *Rna* 26:1389–1399.  
J69 doi:10.1261/rna.075135.120
- J70 Smith BA, Padrick SB, Doolittle LK, Daugherty-Clarke K, Corrêa JIR, Xu M-Q, Goode BL,  
J71 Rosen MK, Gelles J, Sundquist W. 2013. Three-color single molecule imaging shows  
J72 WASP detachment from Arp2/3 complex triggers actin filament branch formation. *eLife* 2.  
J73 doi:10.7554/elife.01008
- J74 Soemedi R, Cygan KJ, Rhine CL, Wang J, Bulacan C, Yang J, Bayrak-Toydemir P, McDonald  
J75 J, Fairbrother WG. 2017. Pathogenic variants that alter protein code often disrupt splicing.  
J76 *Nature Publishing Group* 49:848–855. doi:10.1038/ng.3837
- J77 Staley JP, Guthrie C. 1999. An RNA switch at the 5' splice site requires ATP and the DEAD  
J78 box protein Prp28p. *Molecular Cell* 3:55–64.
- J79 Sternberg SH, Redding S, Jinek M, Greene EC, Doudna JA. 2014. DNA interrogation by the  
J80 CRISPR RNA-guided endonuclease Cas9. *Nature* 507:62–67. doi:10.1038/nature13011
- J81 Tatei K, Takemura K, Tanaka H, Masaki T, Ohshima Y. 1987. Recognition of 5' and 3' splice  
J82 site sequences in pre-mRNA studied with a filter binding technique. *J Biological Chem*  
J83 262:11667–74.
- J84 Vijayraghavan U, Company M, Abelson J. 1989. Isolation and characterization of pre-mRNA  
J85 splicing mutants of *Saccharomyces cerevisiae*. 3:1206–1216.
- J86 Wahl MC, Will CL, Lührmann R. 2009. The spliceosome: design principles of a dynamic RNP  
J87 machine. *Cell* 136:701–718. doi:10.1016/j.cell.2009.02.009

- J88 Wetmur JG. 1991. DNA probes: applications of the principles of nucleic acid hybridization.  
J89 Critical reviews in biochemistry and molecular biology 26:227–259.  
J90 doi:10.3109/10409239109114069
- J91 Wetmur JG, Davidson N. 1968. Kinetics of renaturation of DNA. Journal of molecular biology  
J92 31:349–370.
- J93 Wilkinson ME, Fica SM, Galej WP, Norman CM, Newman AJ, Nagai K. 2017. Postcatalytic  
J94 spliceosome structure reveals mechanism of 3'-splice site selection. Science (New York,  
J95 NY) 358:1283–1288. doi:10.1126/science.aar3729
- J96 Yan C, Wan R, Shi Y. 2019. Molecular Mechanisms of pre-mRNA Splicing through Structural  
J97 Biology of the Spliceosome. Cold Spring Harbor Perspectives in Biology 11:a032409.  
J98 doi:10.1101/cshperspect.a032409
- J99 Yeo G, Burge CB. 2004. Maximum Entropy Modeling of Short Sequence Motifs with  
100 Applications to RNA Splicing Signals. J Comput Biol 11:377–394.  
101 doi:10.1089/1066527041410418
- 102 Zhang D, Rosbash M. 1999. Identification of eight proteins that cross-link to pre-mRNA in the  
103 yeast commitment complex. Gene Dev 13:581–592. doi:10.1101/gad.13.5.581
- 104 Zhang S, Aibara S, Vos SM, Agafonov DE, Lührmann R, Cramer P. 2021. Structure of a  
105 transcribing RNA polymerase II–U1 snRNP complex. Science 371:305–309.  
106 doi:10.1126/science.abf1870
- 107 Zuker M. 2003. Mfold web server for nucleic acid folding and hybridization prediction. Nucleic  
108 Acids Res 31:3406–3415. doi:10.1093/nar/gkg595

109

110
